# Supplementary material for: Synthesis and bioactivities evaluation of oleanolic acid oxime ester derivatives as α-glucosidase and α-amylase inhibitors
Source: PubMed Central journal article supplement (PMC8757604; doi:10.1080/14756366.2021.2018682), 2022-01-10
Supplement: IENZ_A_2018682_SM6712.pdf [file IENZ_A_2018682_SM6712.pdf]

## Supporting Information

### Synthesis and bioactivities evaluation of oleanolic acid oxime ester derivatives as $\alpha$ -glucosidase and $\alpha$ -amylase inhibitors

Xu-Yang Deng<sup>a</sup>, Jun-Jie Ke<sup>a</sup>, Ying-Ying Zheng<sup>a</sup>, Dong-Li Li<sup>a</sup>, Kun Zhang<sup>a</sup>, Xi Zheng<sup>b</sup>, Zhuang Xiong<sup>a,\*</sup>, Pan-Pan Wu<sup>a,\*</sup>, Xue-Tao Xu<sup>a,\*</sup>

<sup>a</sup>*School of biotechnology and health sciences, Wuyi University, Jiangmen 529020, P.R. China*

<sup>b</sup>*Department of Chemical Biology, Ernest Mario School of Pharmacy, Rutgers, The State University of New Jersey, Piscataway, NJ 08854, USA*

1. NMR of compounds.....2-21
2. ESI-MS of compounds.....22-31

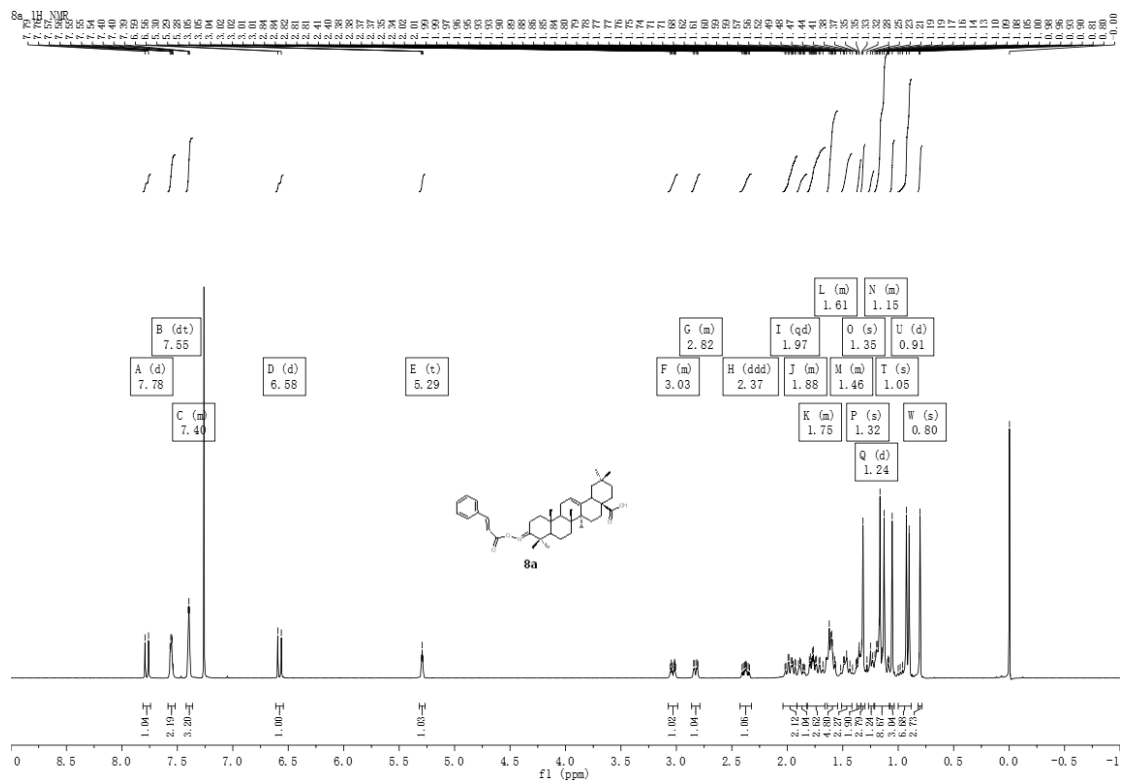

Fig.1 3a (<sup>1</sup>H NMR)

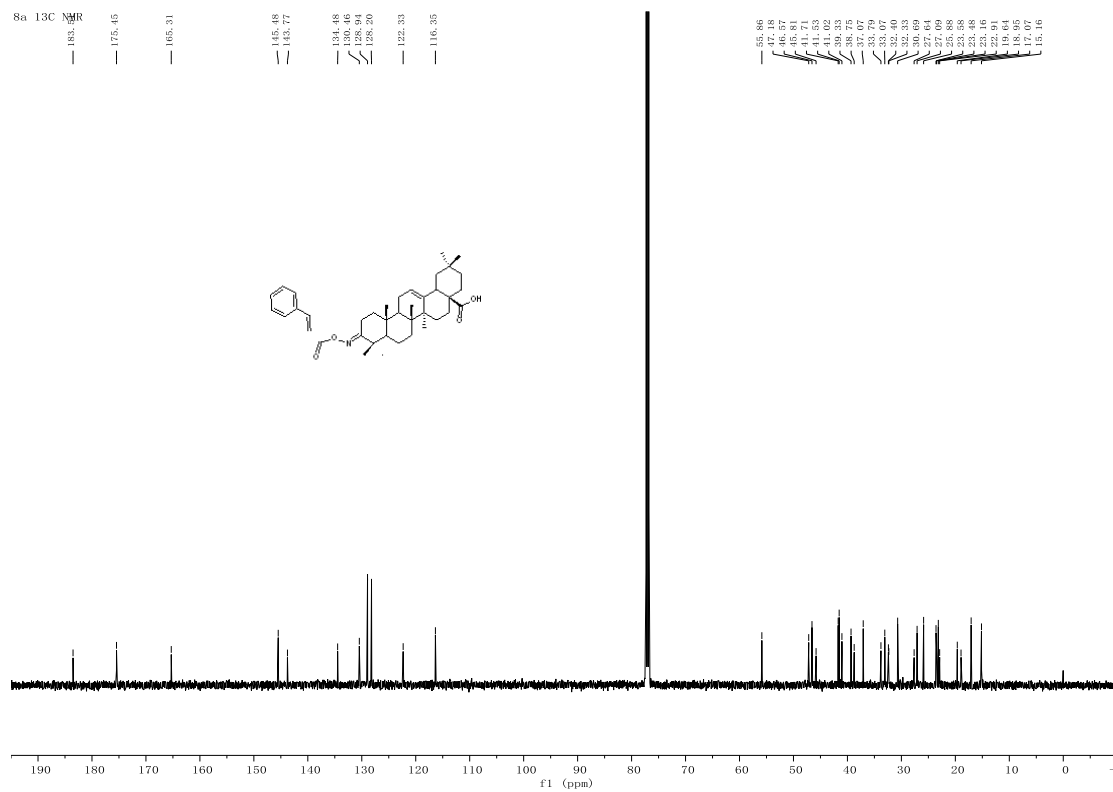

Fig.2 3a (<sup>13</sup>C NMR)

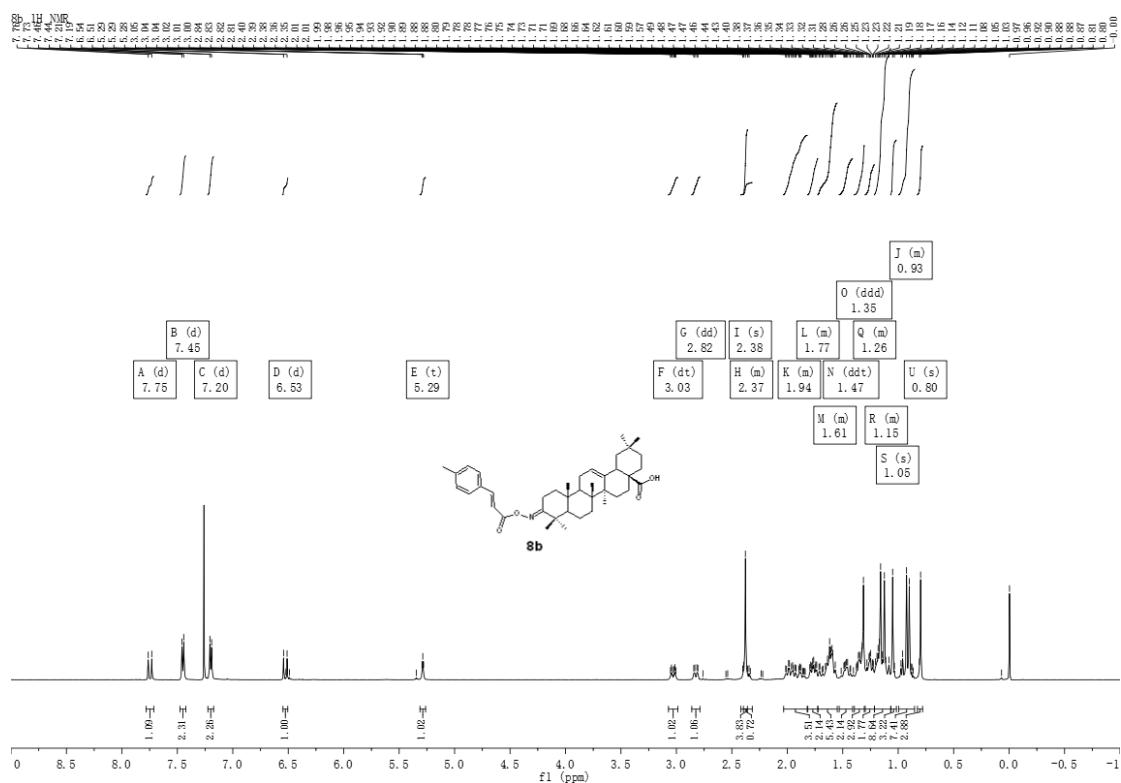

Fig.3 **3b** ( $^1\text{H}$  NMR)

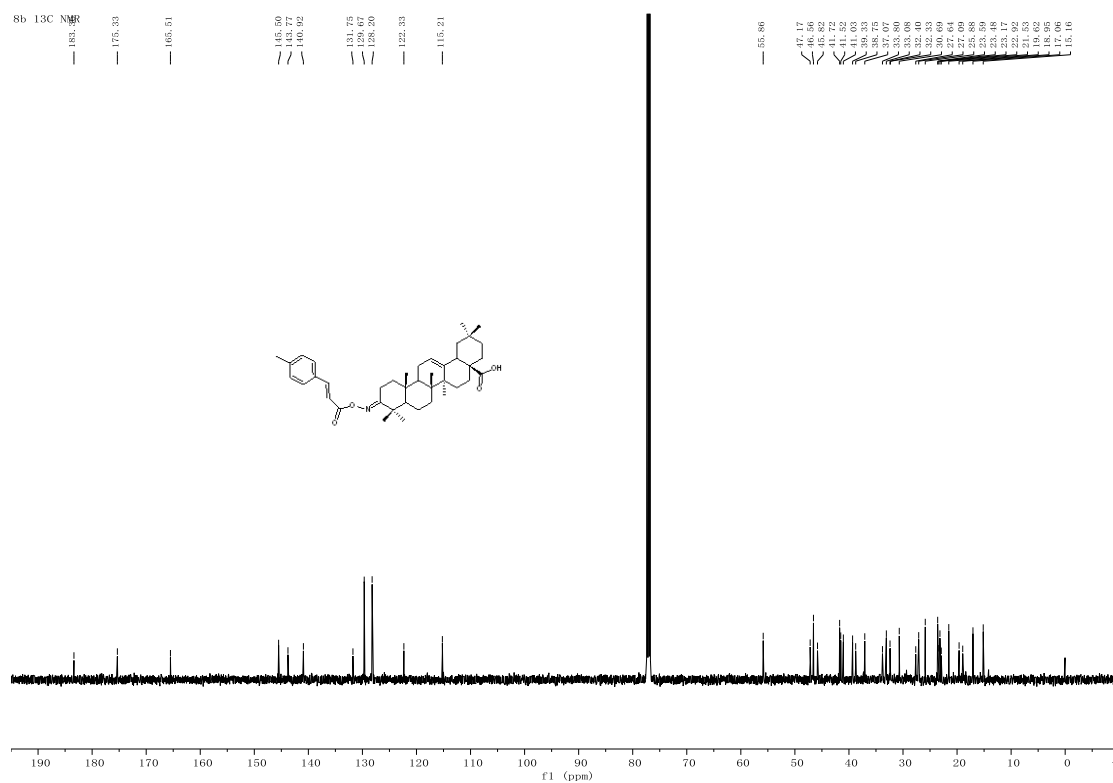

Fig.4 **3b** ( $^{13}\text{C}$  NMR)

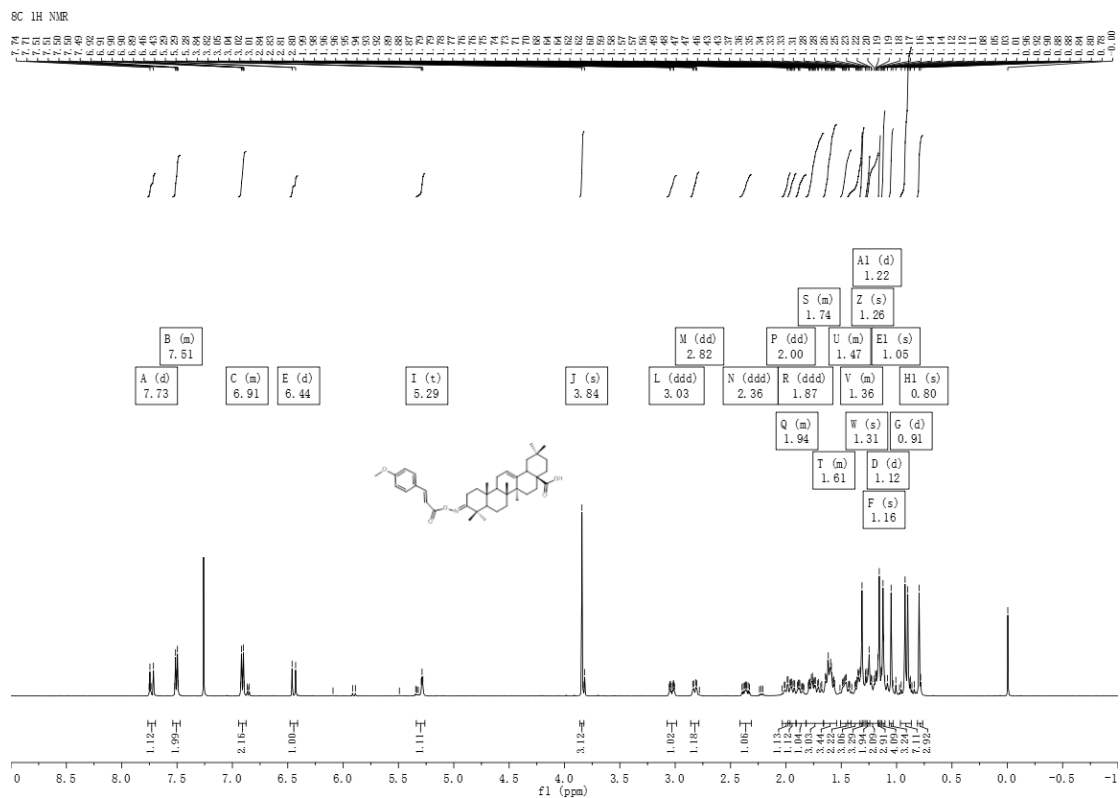

Fig.5 3c (<sup>1</sup>H NMR)

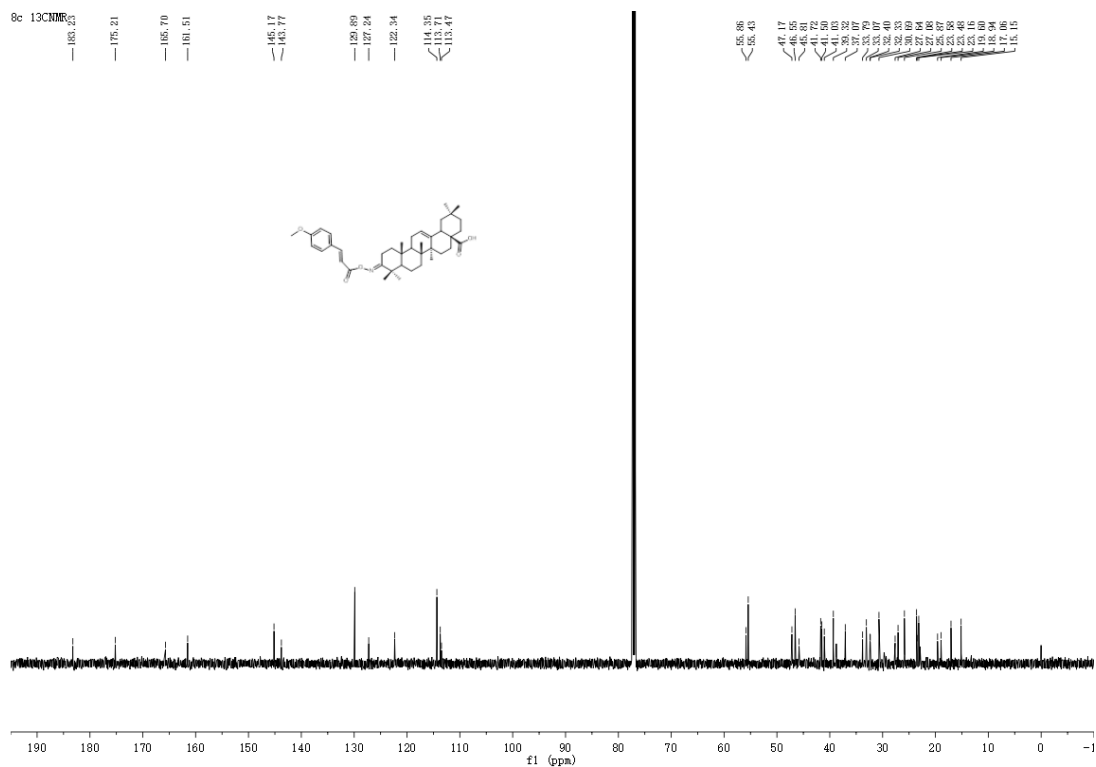

Fig.6 3c (<sup>13</sup>C NMR)



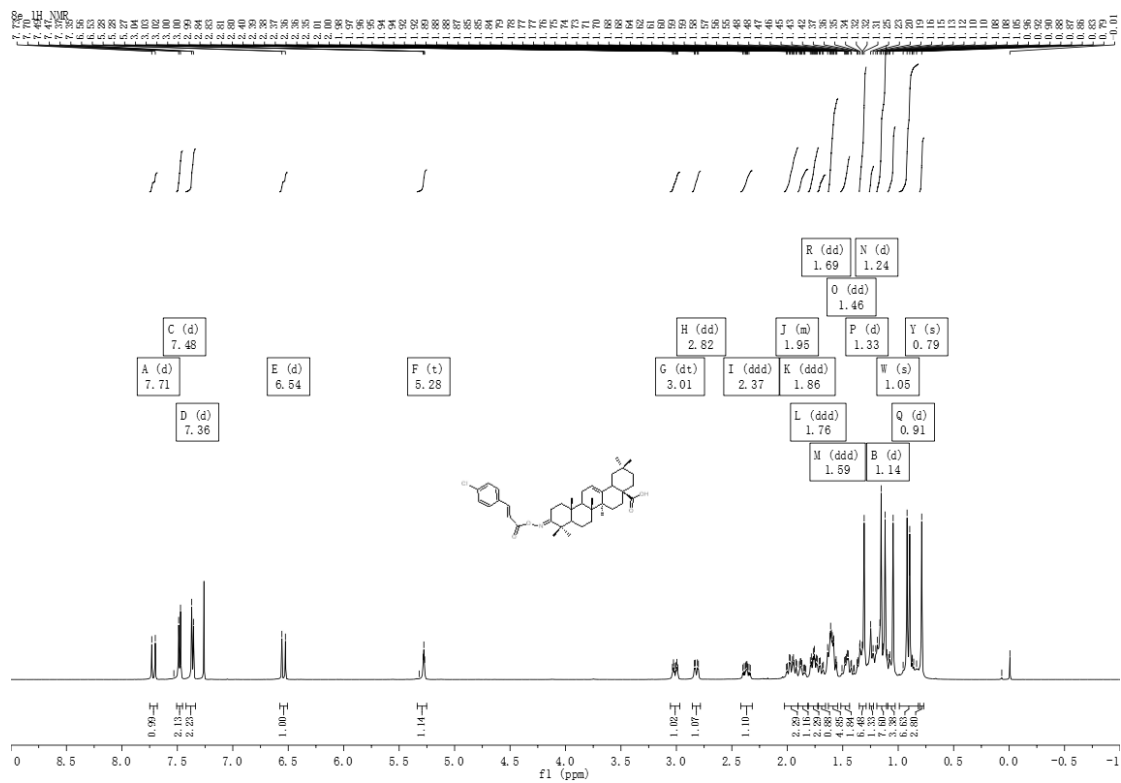

Fig.9 3e ( $^1\text{H}$  NMR)

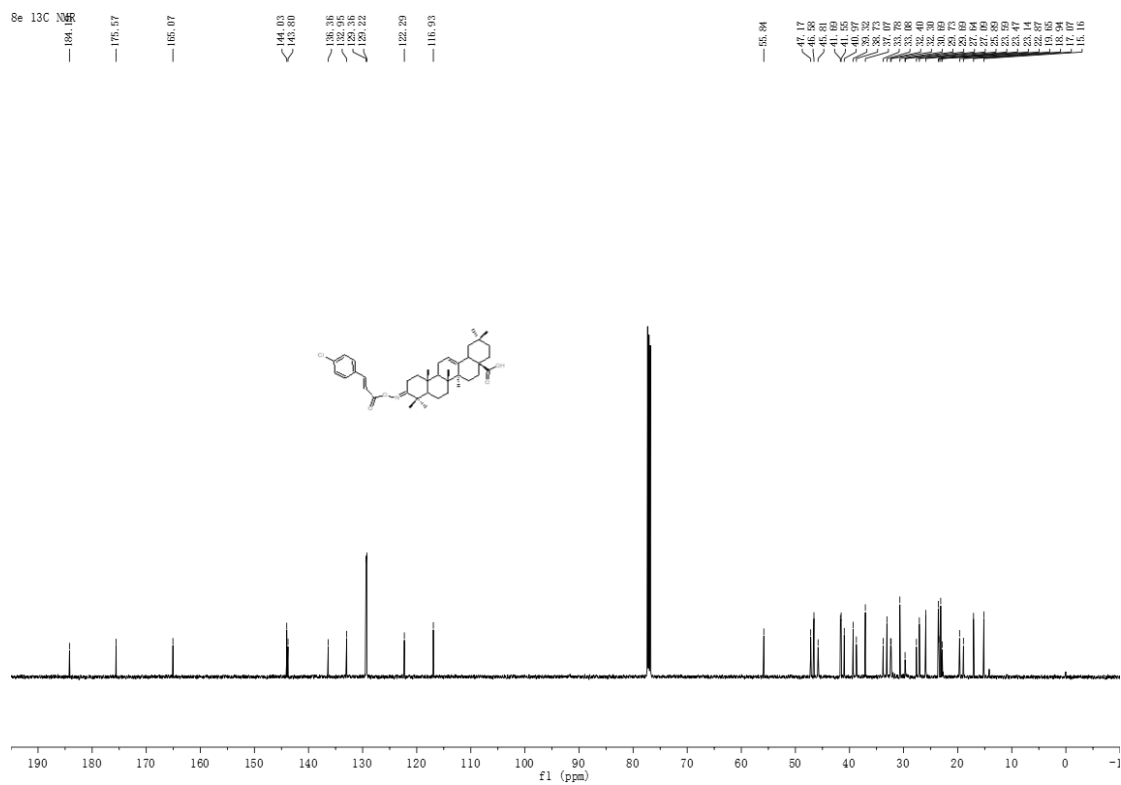

Fig.10 3e ( $^{13}\text{C}$  NMR)

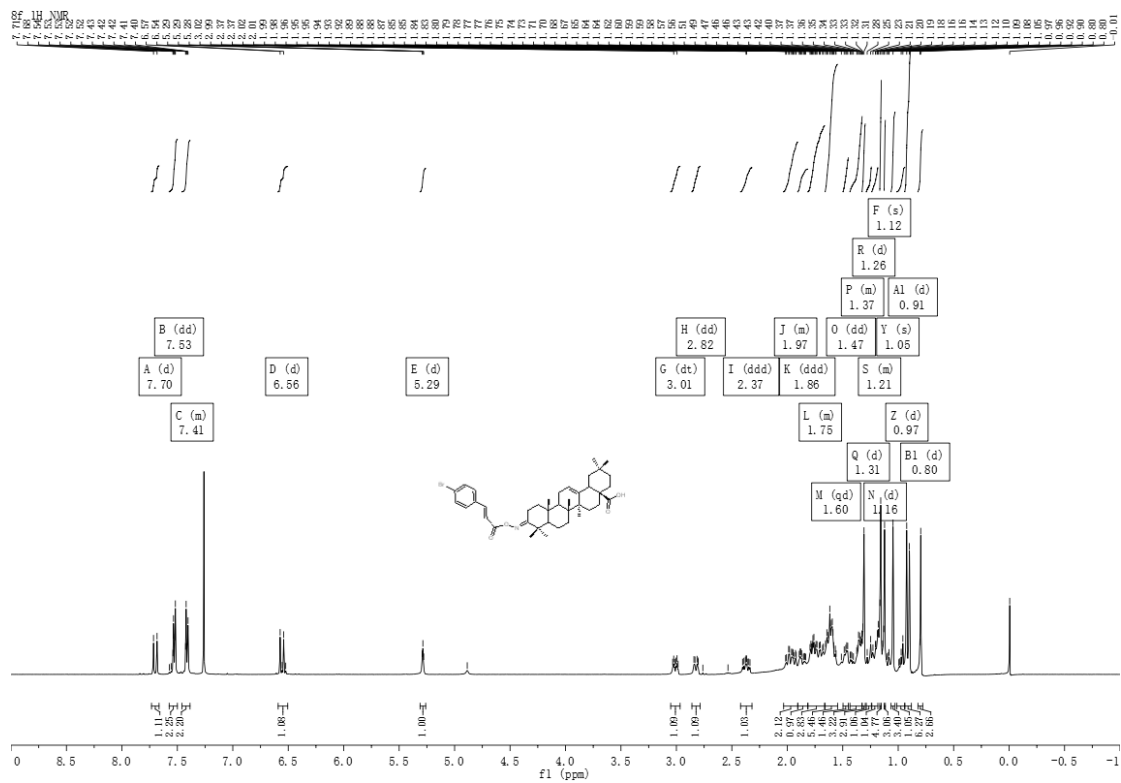

Fig.11 3f (<sup>1</sup>H NMR)

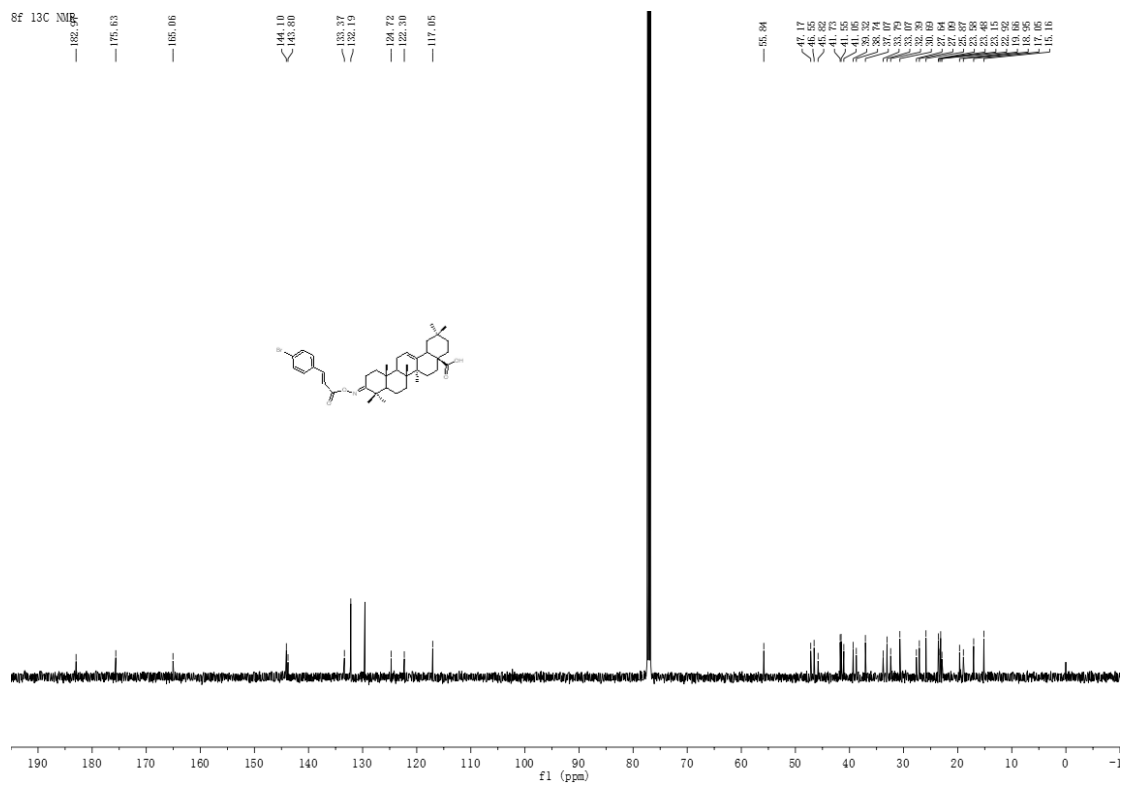

Fig.12 3f (<sup>13</sup>C NMR)











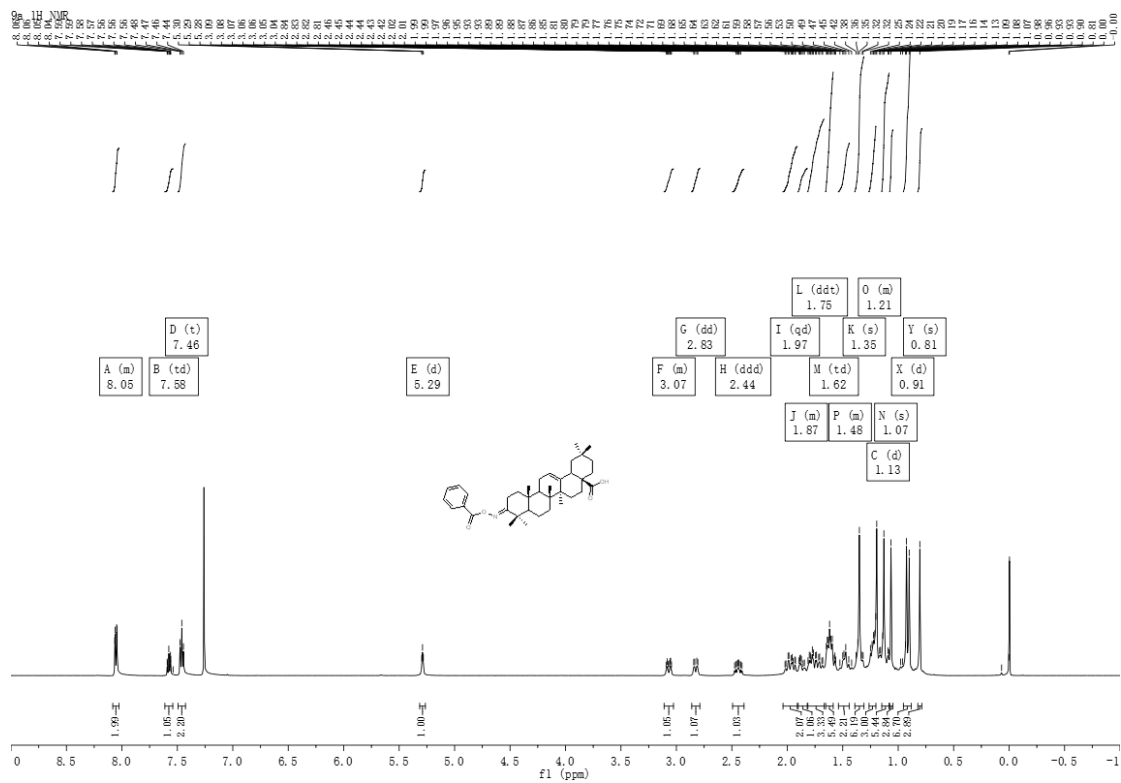

Fig.21 3k ( $^1\text{H}$  NMR)

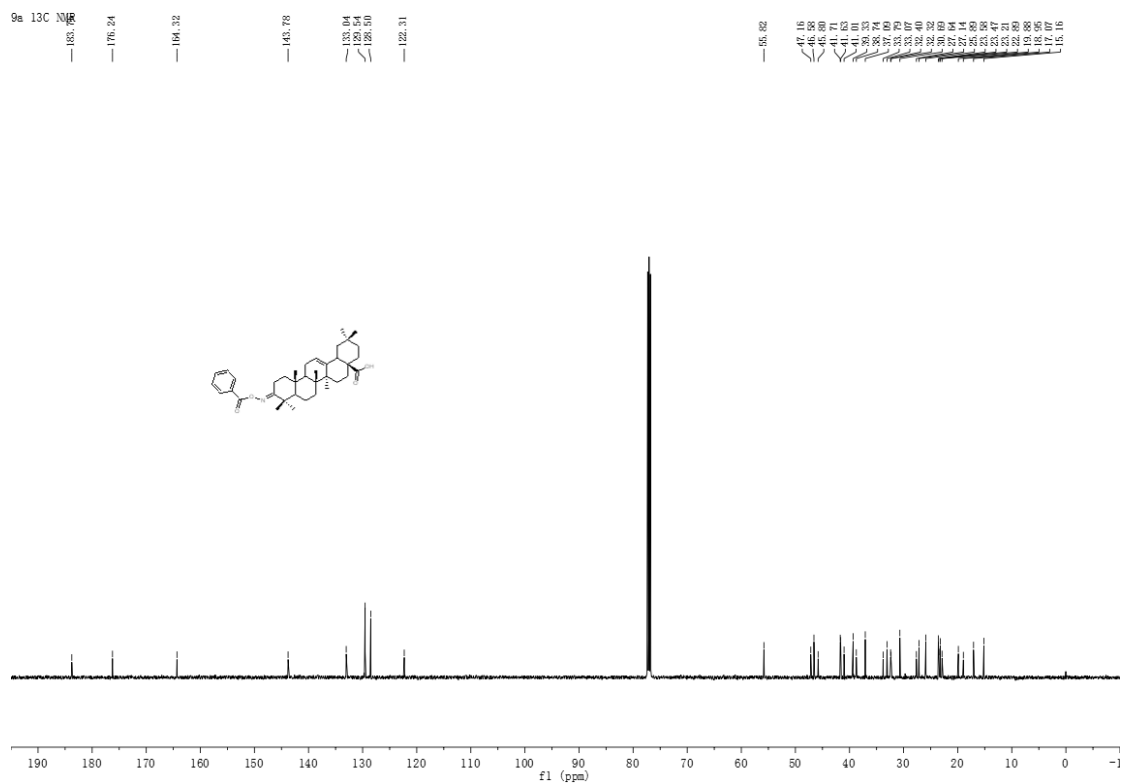

Fig.22 3k ( $^{13}\text{C}$  NMR)

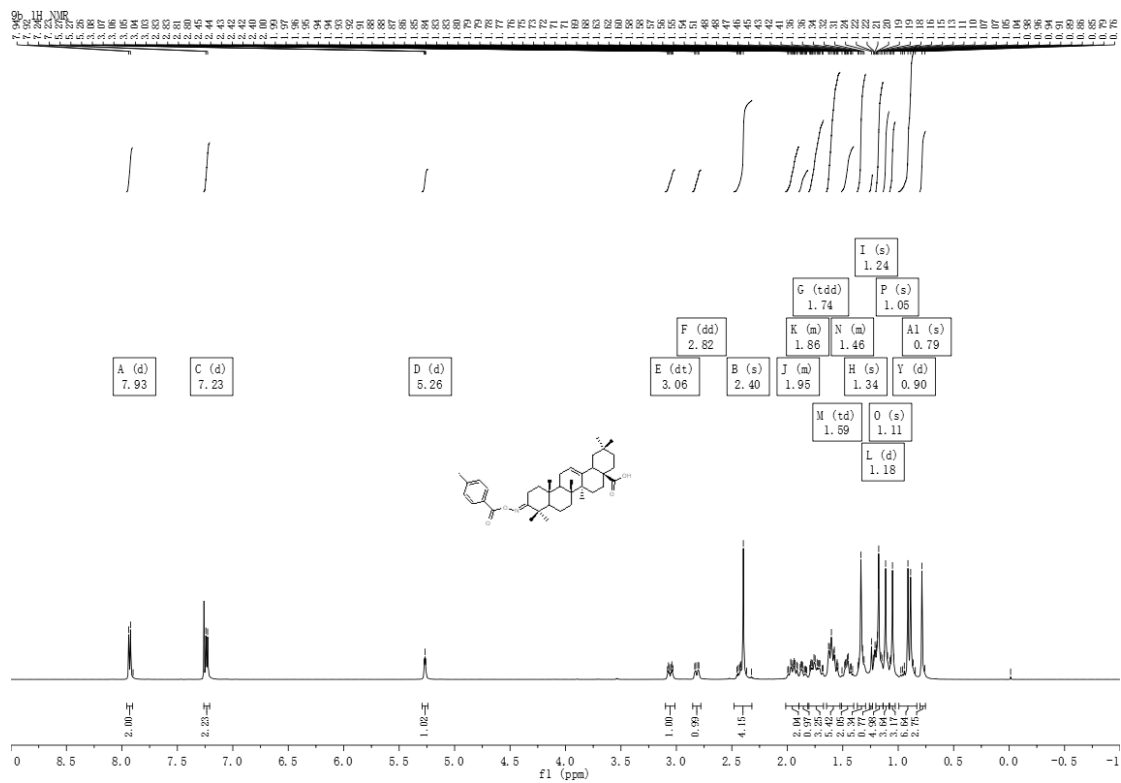

Fig.23 31 (<sup>1</sup>H NMR)

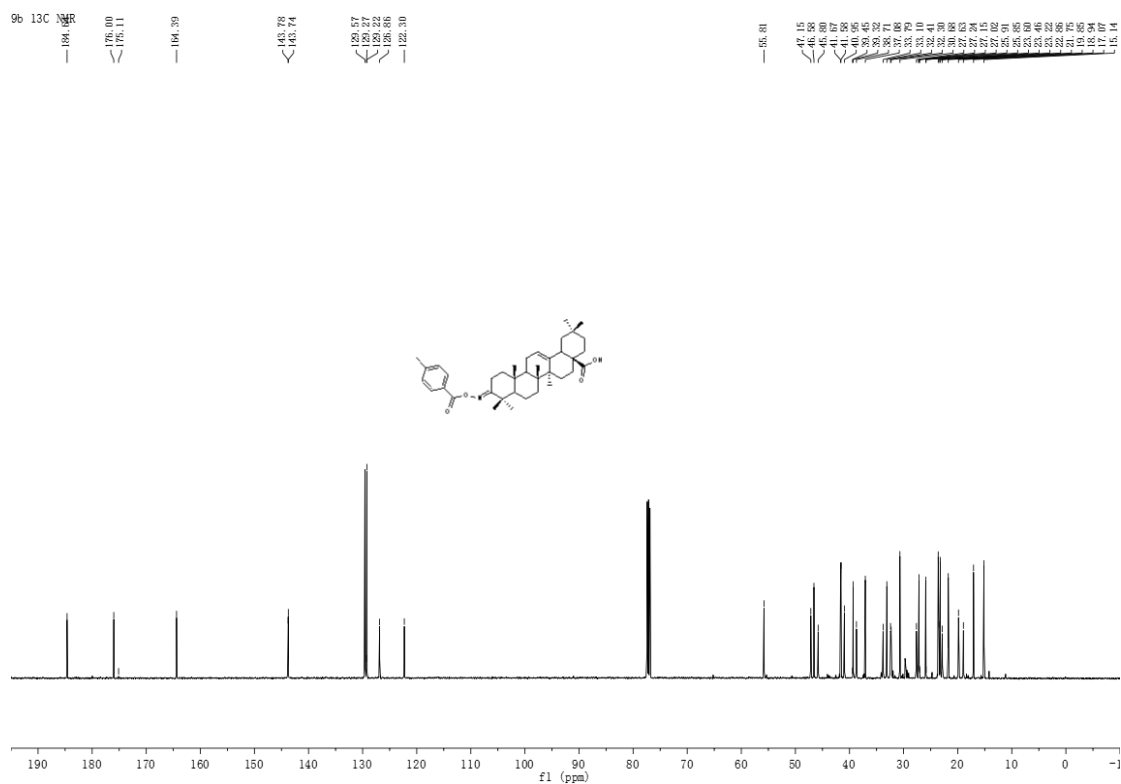

Fig.24 31 (<sup>13</sup>C NMR)

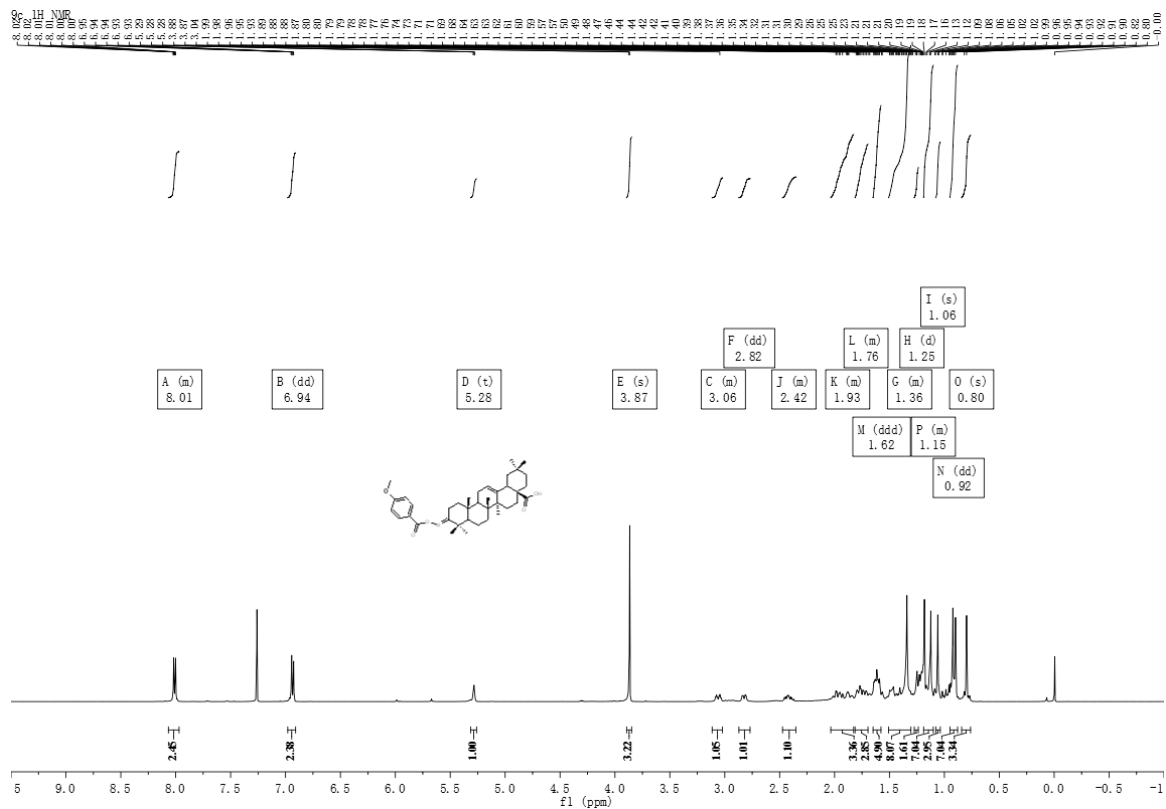

Fig.25 3m ( $^1\text{H}$  NMR)

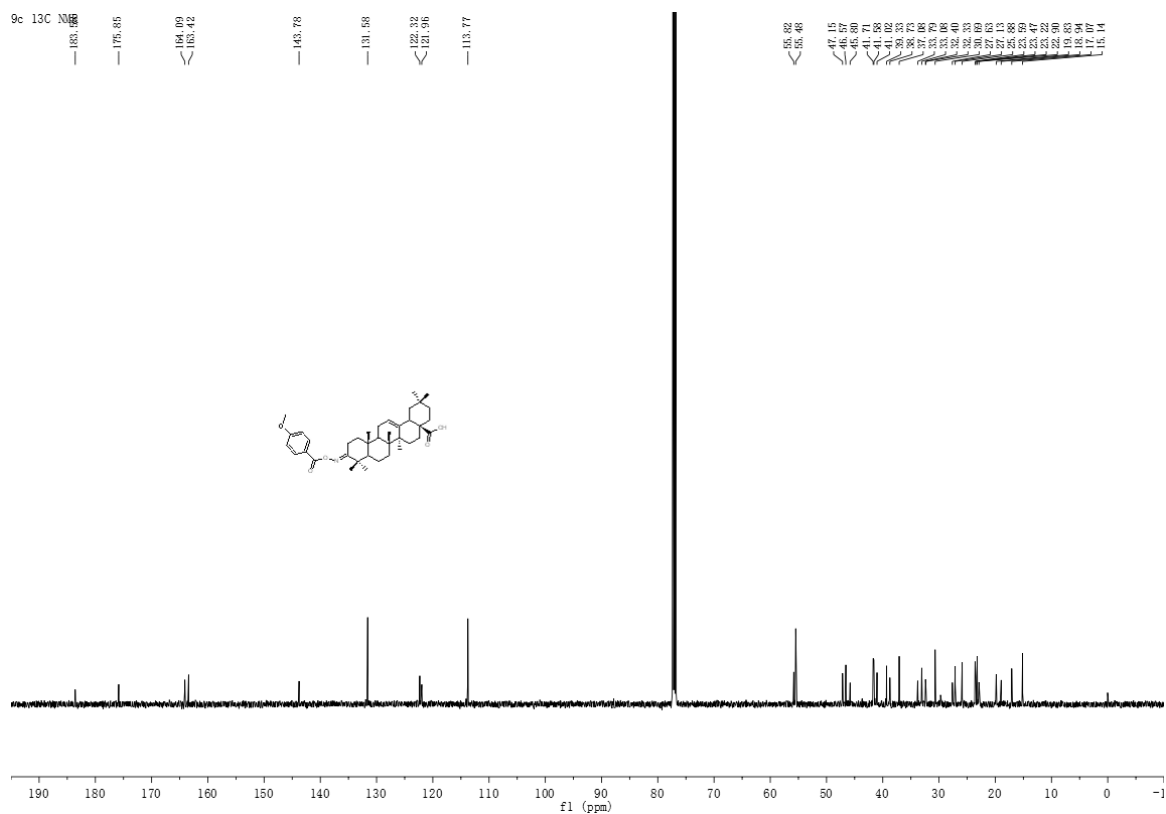

Fig.26 3m ( $^{13}\text{C}$  NMR)

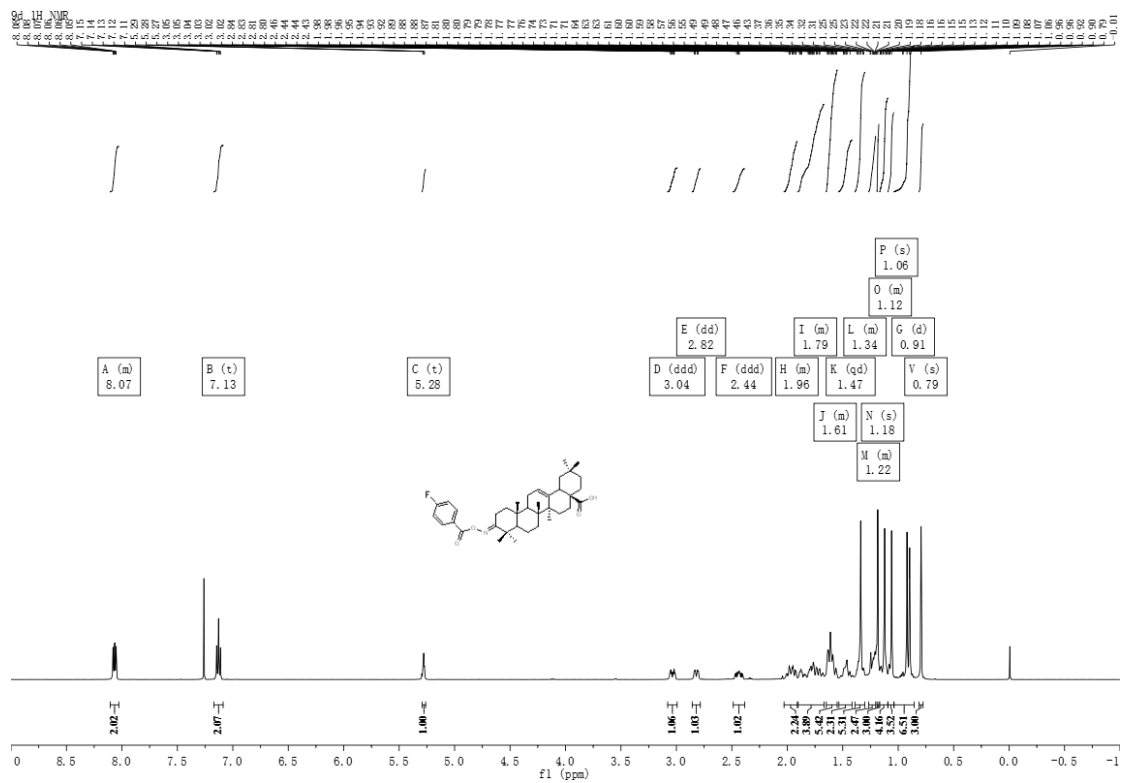

Fig.27 **3n** ( $^1\text{H}$  NMR)

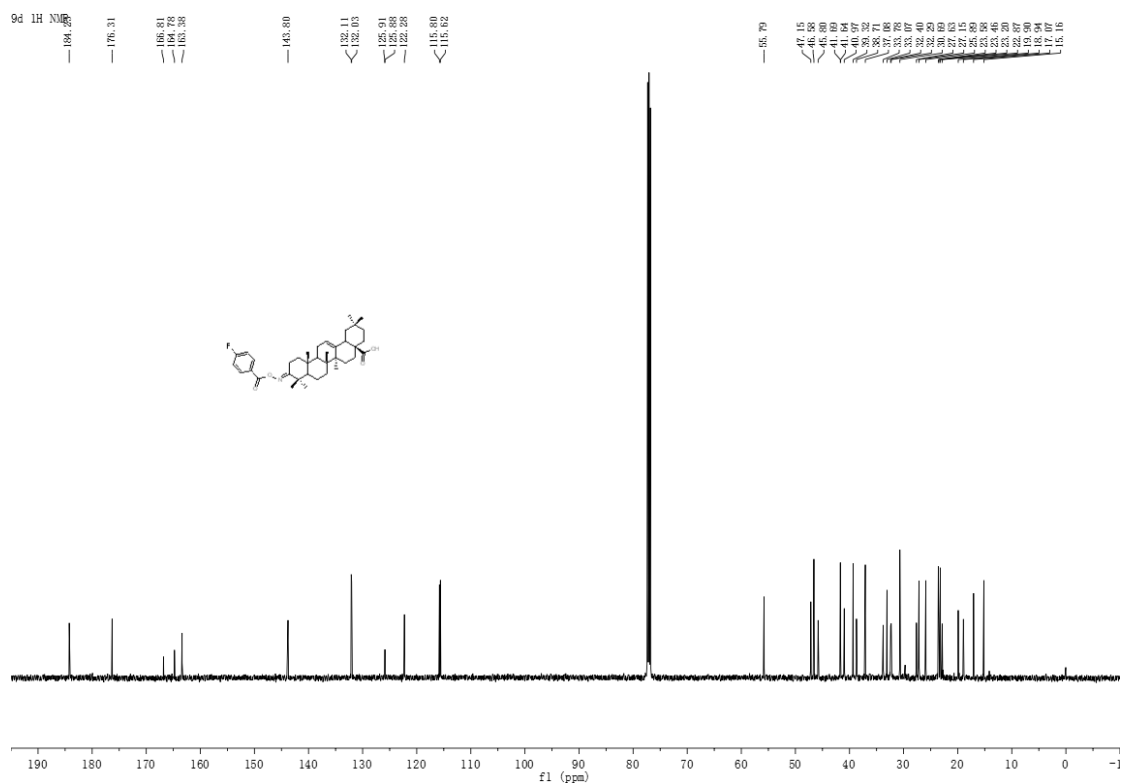

Fig.28 **3n** ( $^{13}\text{C}$  NMR)





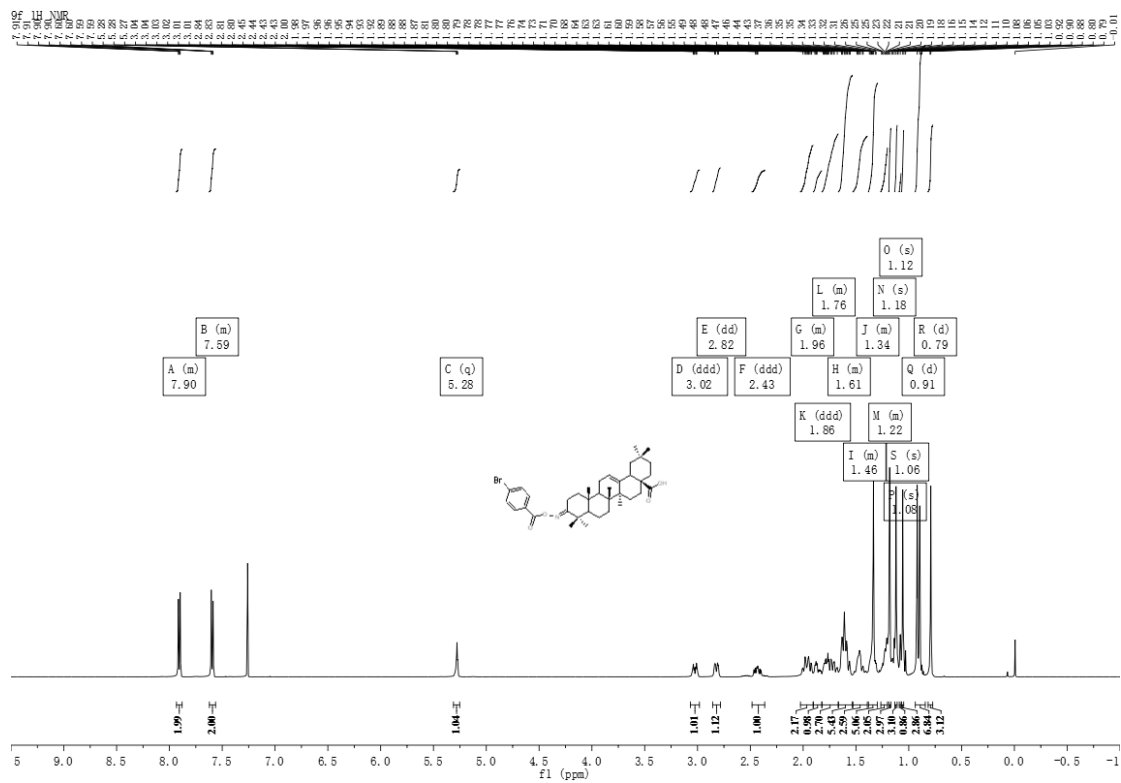

Fig.31 3p (<sup>1</sup>H NMR)

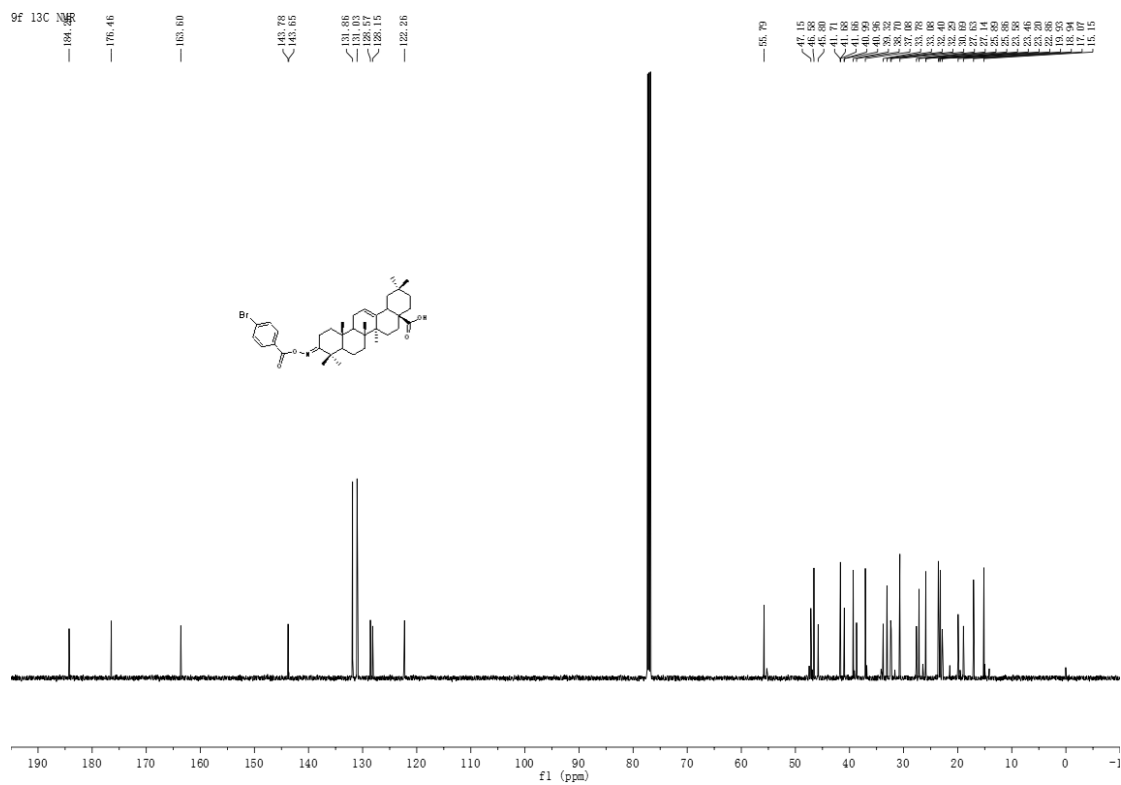

Fig.32 3p (<sup>13</sup>C NMR)



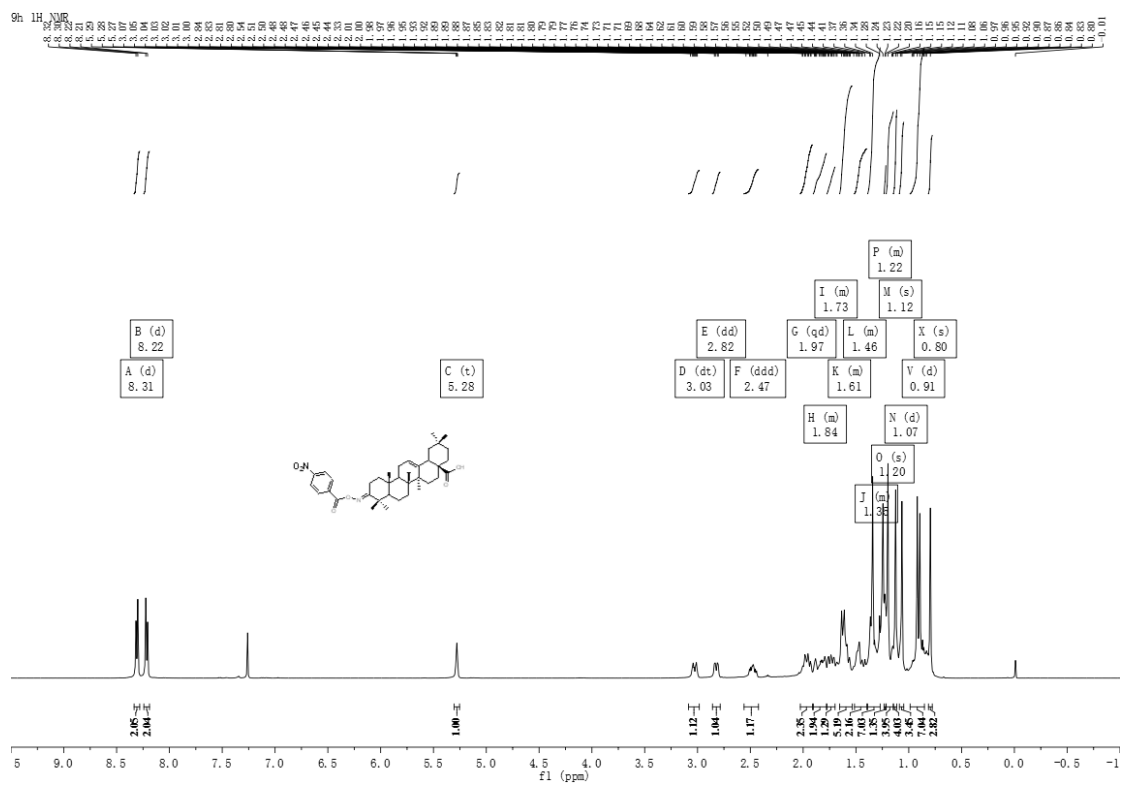

Fig.35 **3r** (<sup>1</sup>H NMR)

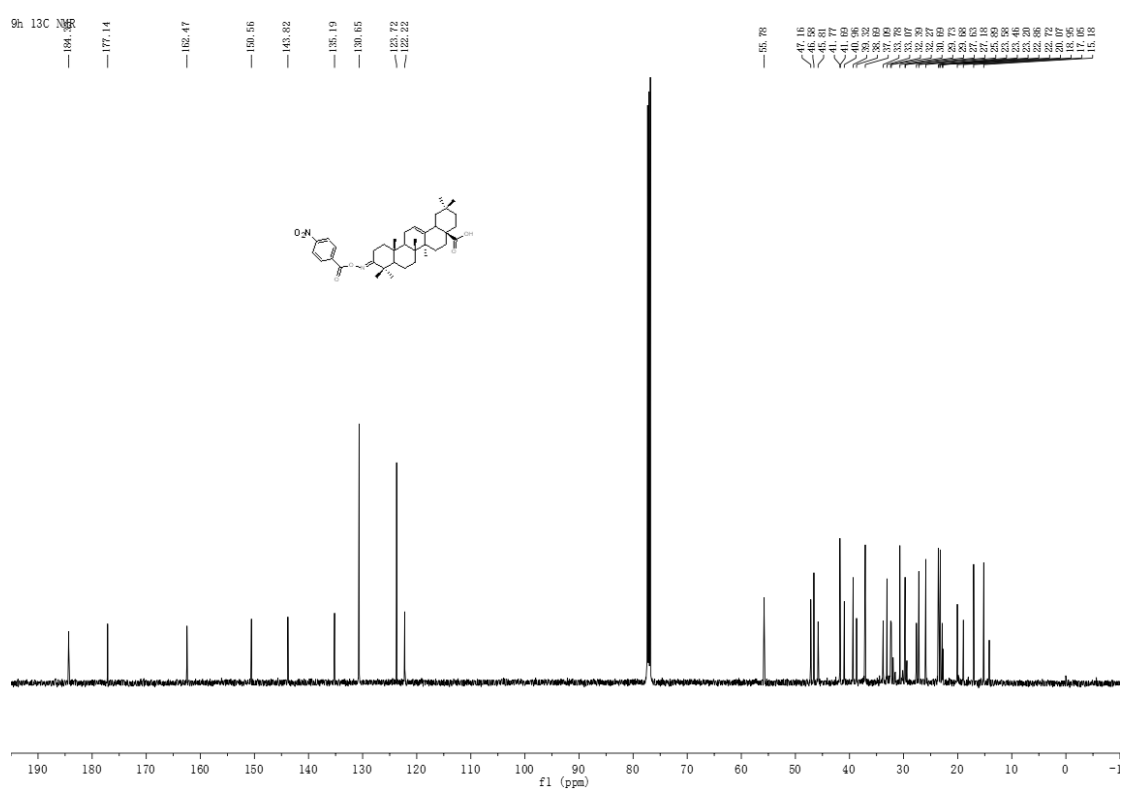

Fig.36 **3r** (<sup>13</sup>C NMR)

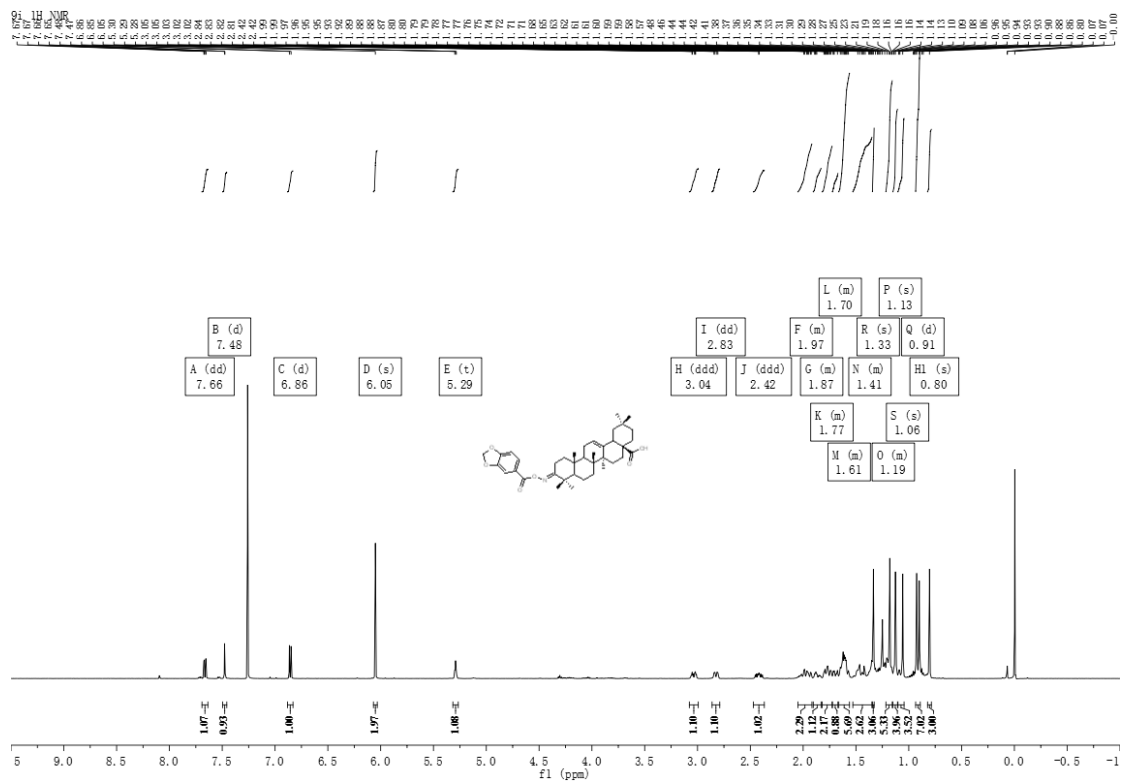

Fig.37 3s ( $^1\text{H}$  NMR)

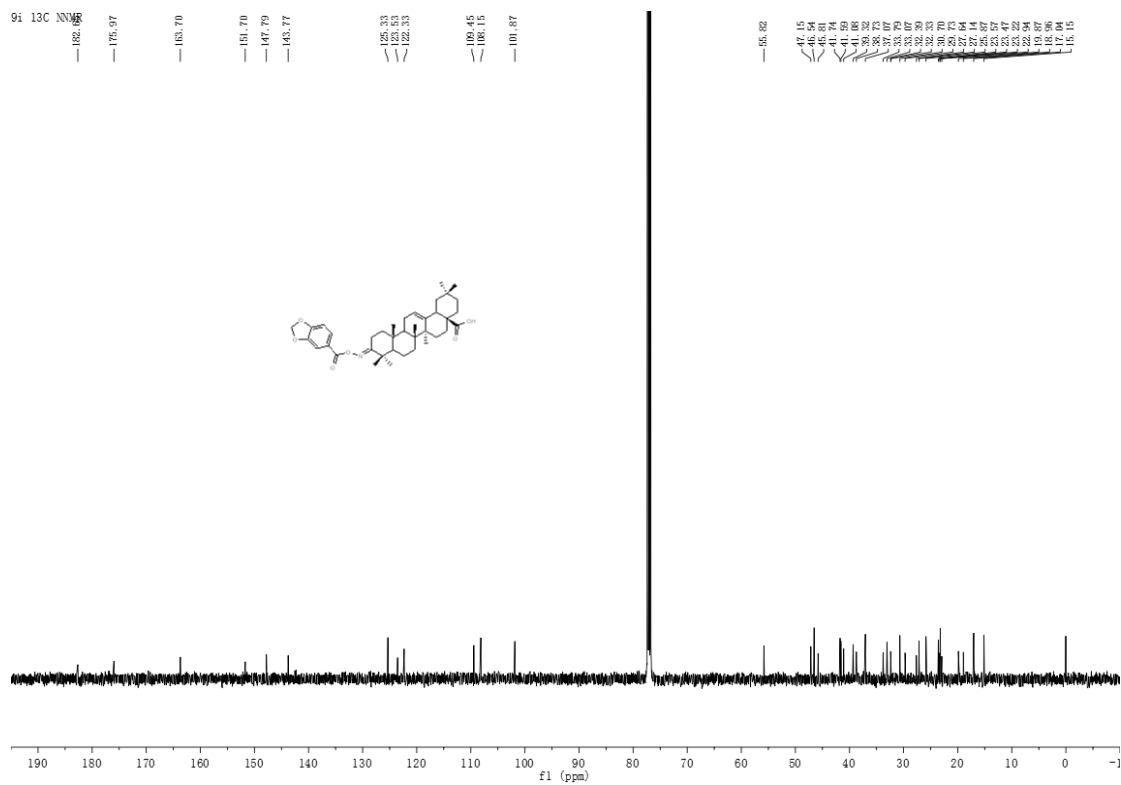

Fig.38 3s ( $^{13}\text{C}$  NMR)

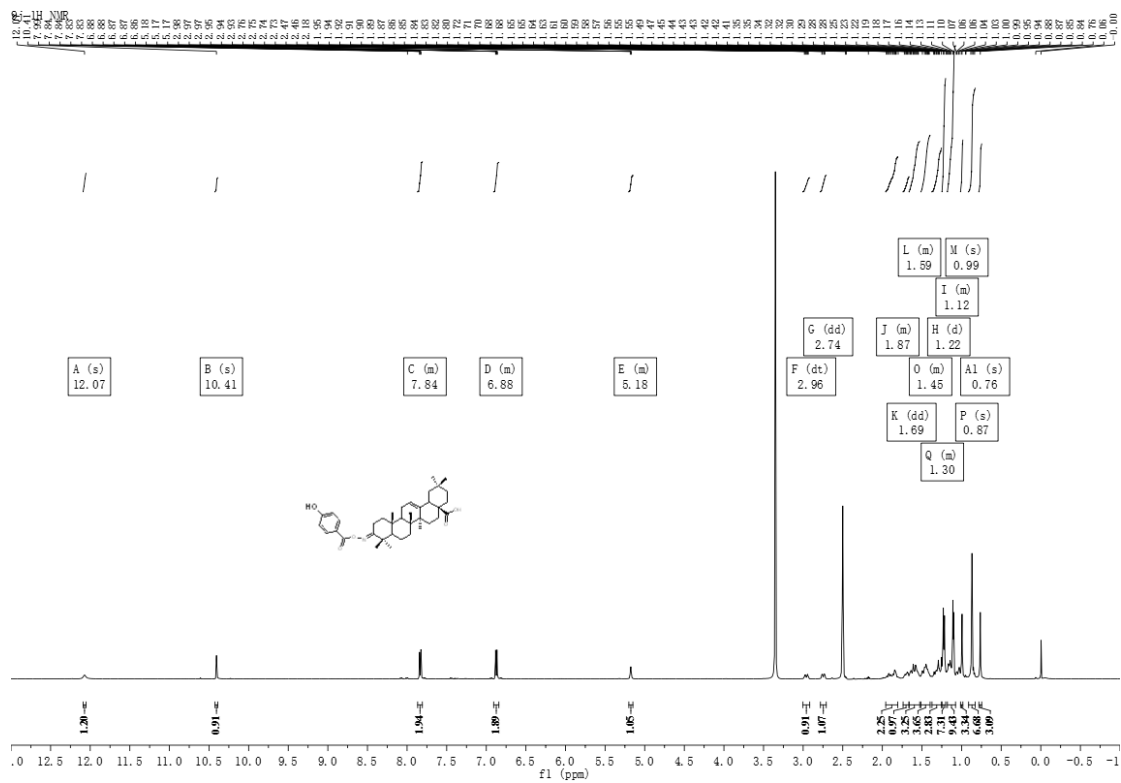

Fig.39 3t ( $^1\text{H}$  NMR)

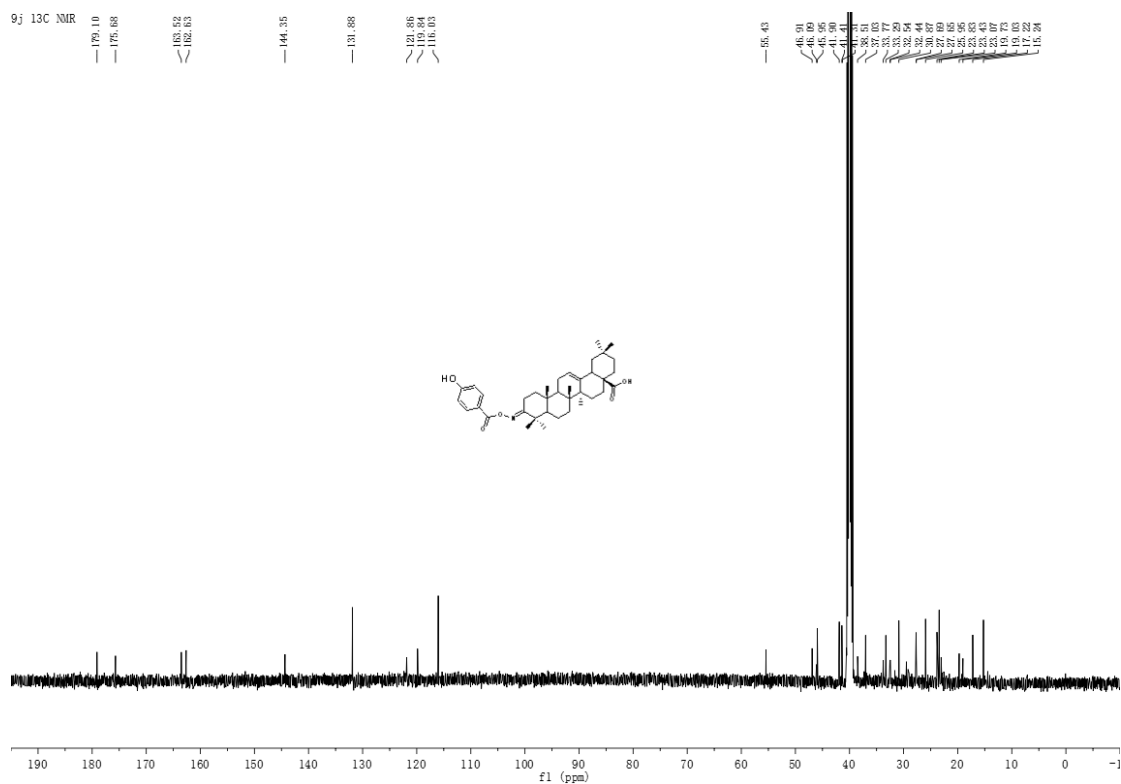

Fig.40 3t ( $^{13}\text{C}$  NMR)

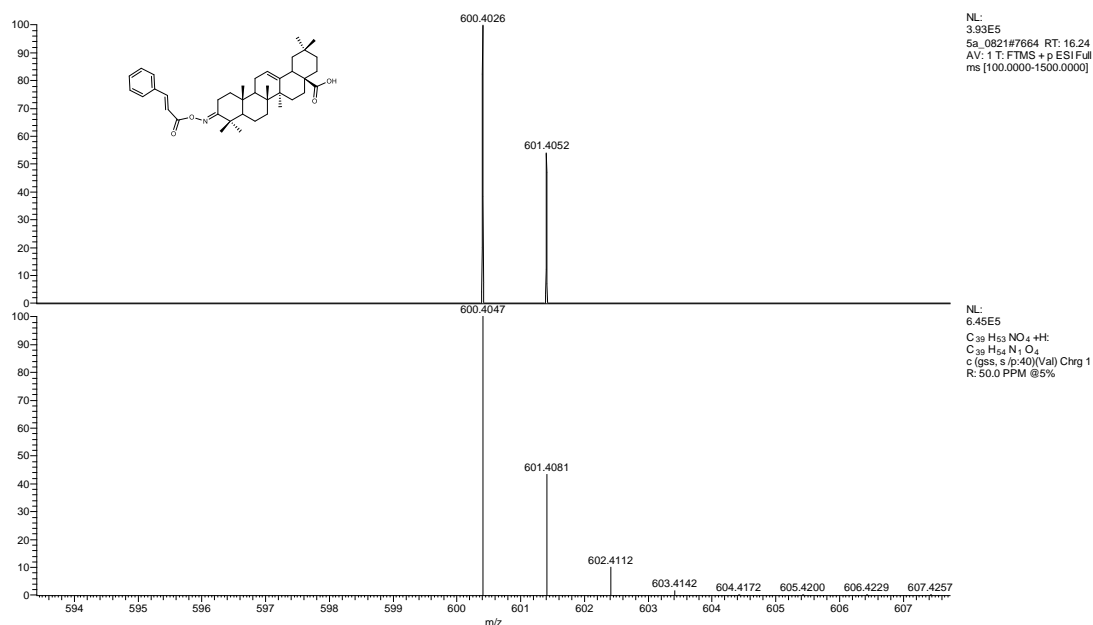

Fig.41 **3a** (HRMS)

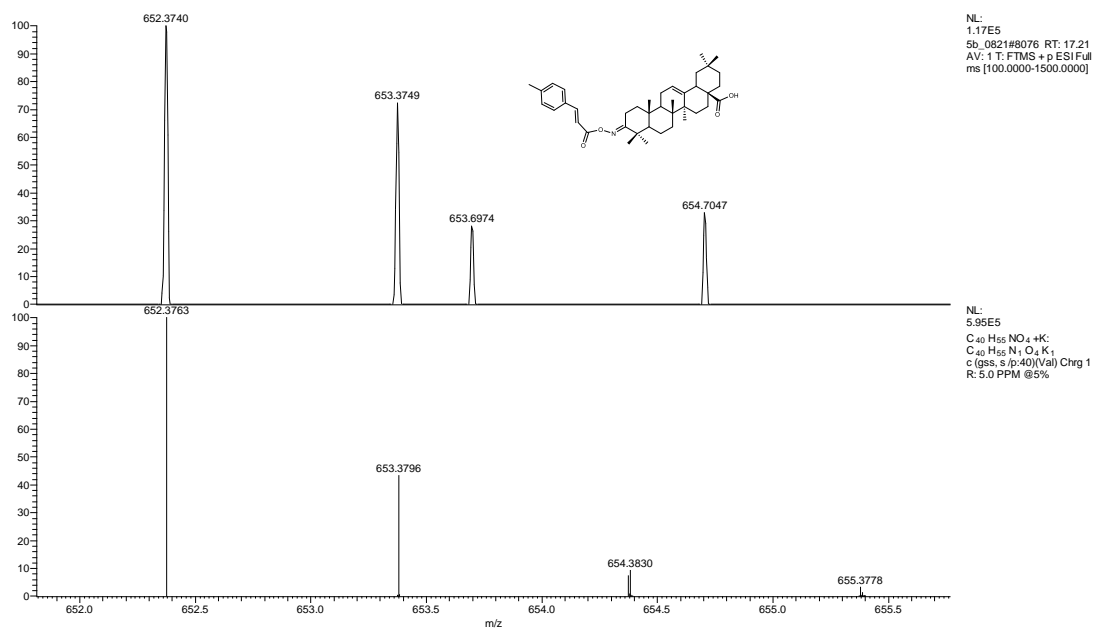

Fig.42 **3b** (HRMS)

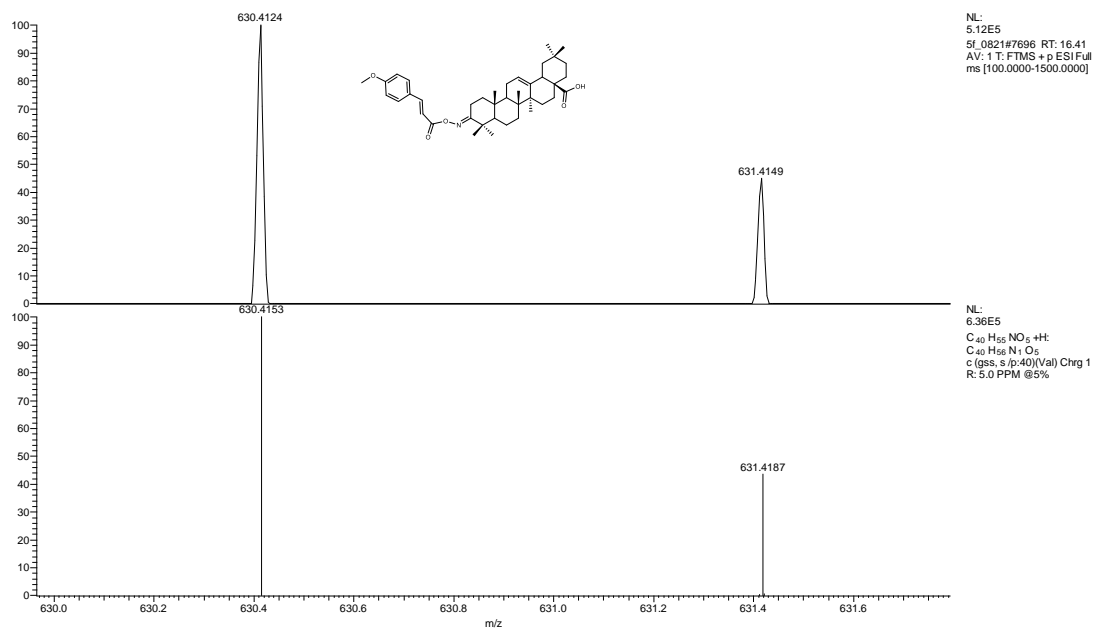

Fig.43 3c (HRMS)

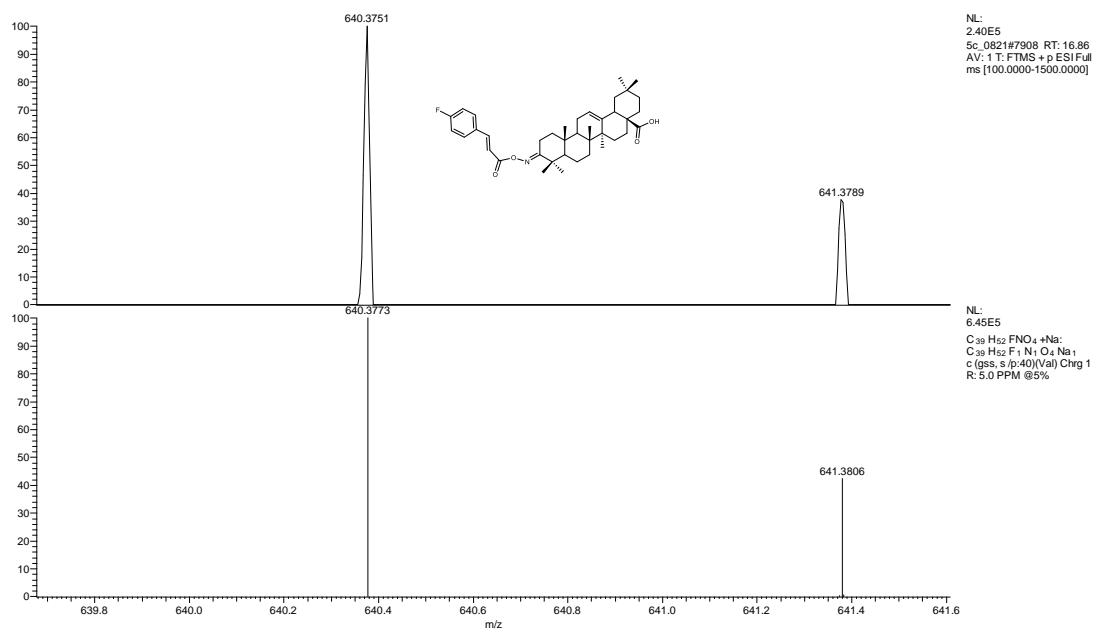

Fig.44 3d (HRMS)

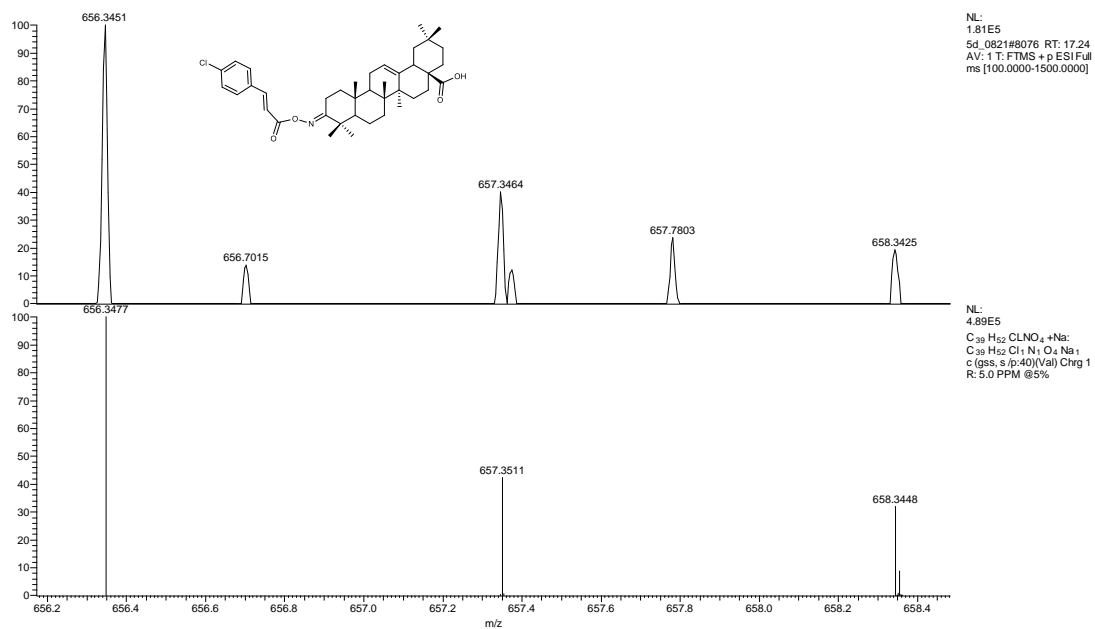

Fig.45 **3e** (HRMS)

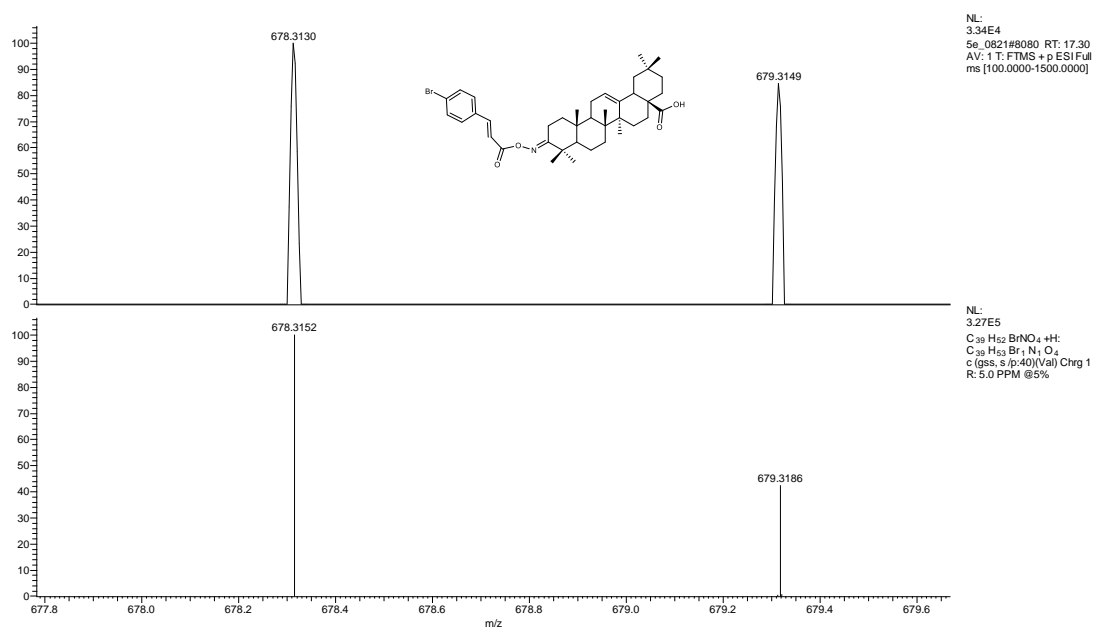

Fig.46 **3f** (HRMS)



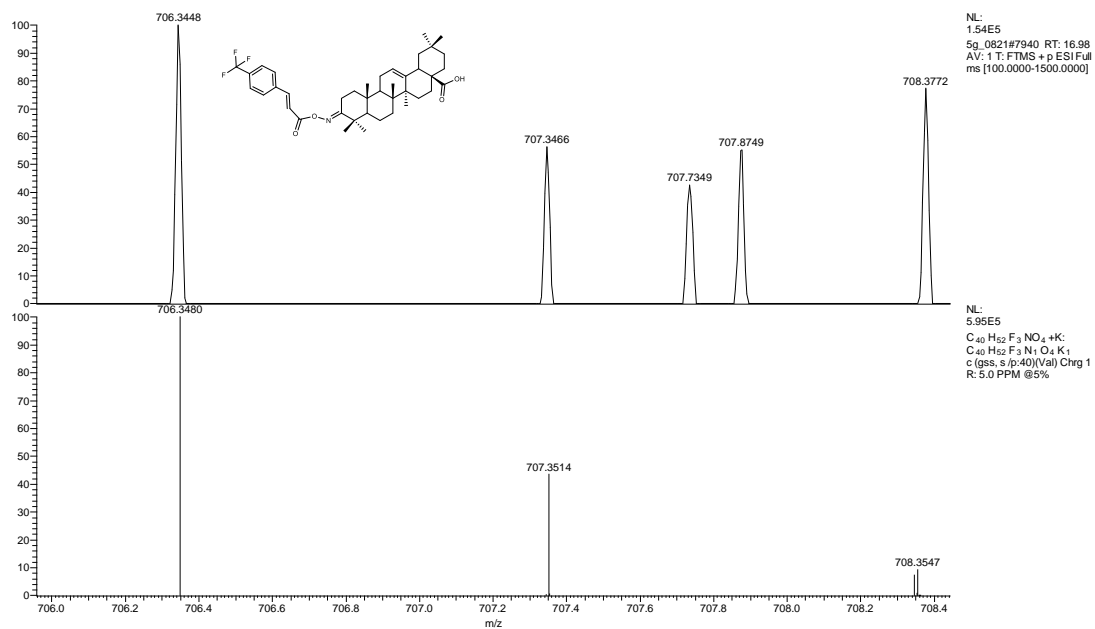

Fig.47 **3g** (HRMS)

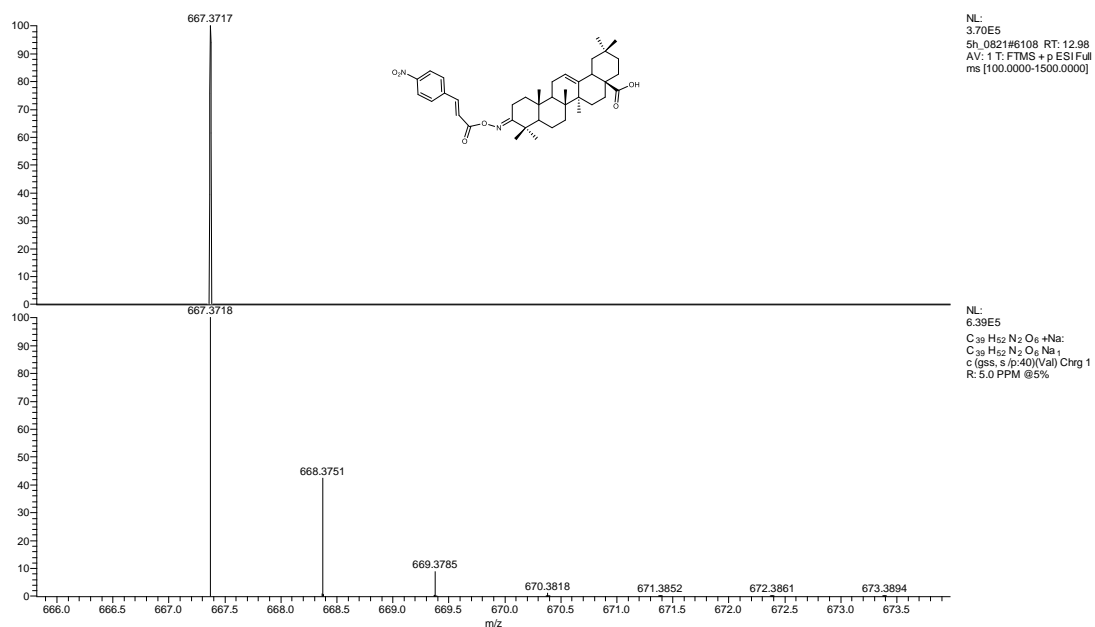

Fig.48 **3h** (HRMS)

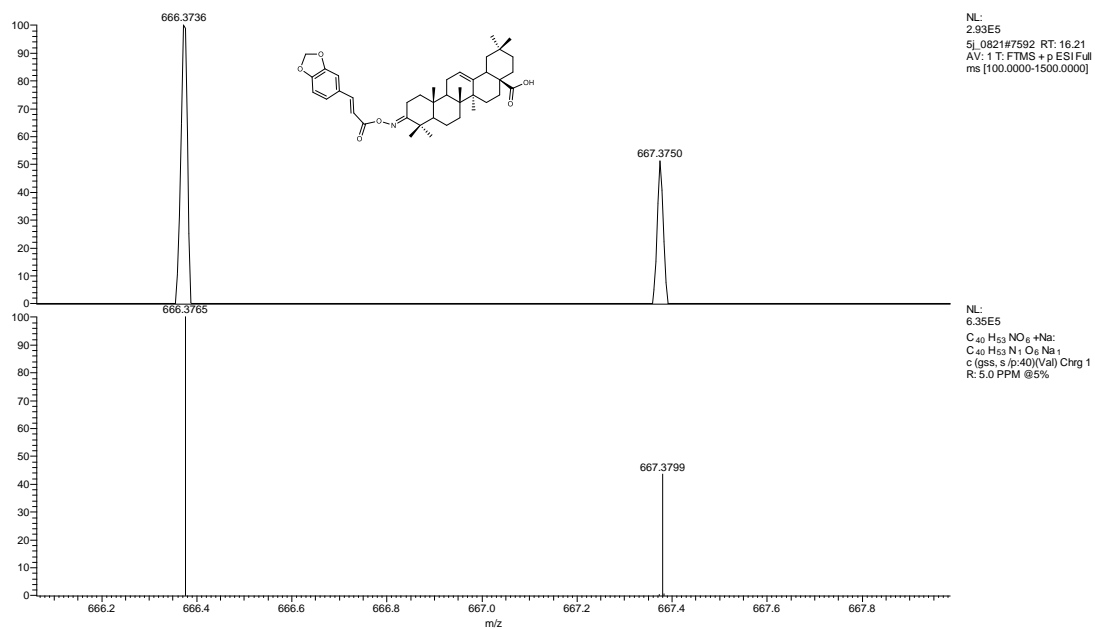

Fig.49 **3i** (HRMS)

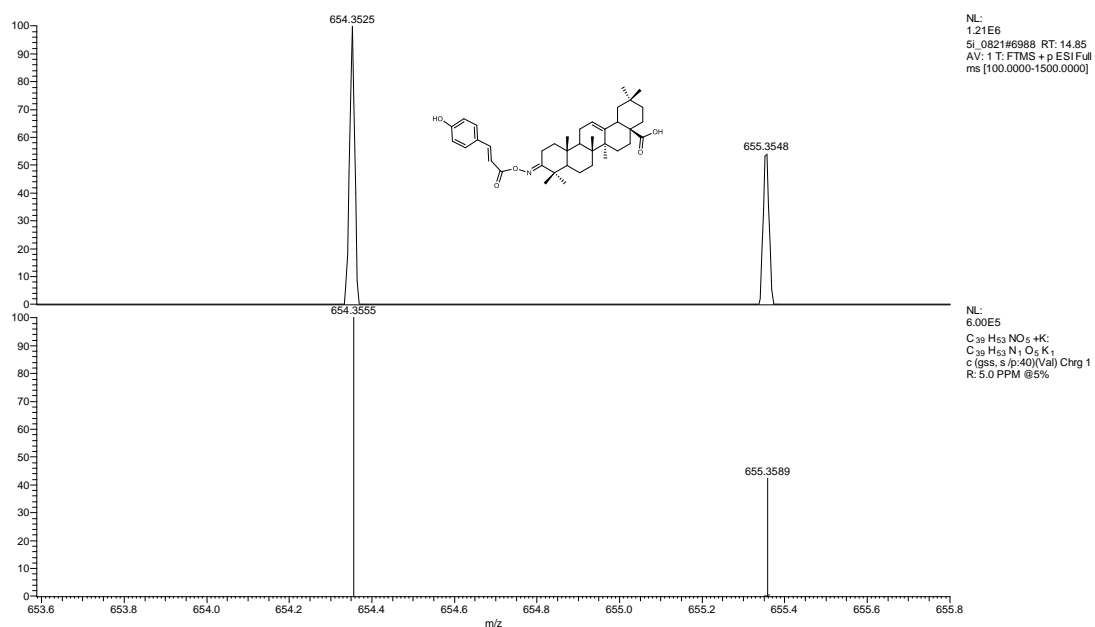

Fig.50 **3j** (HRMS)

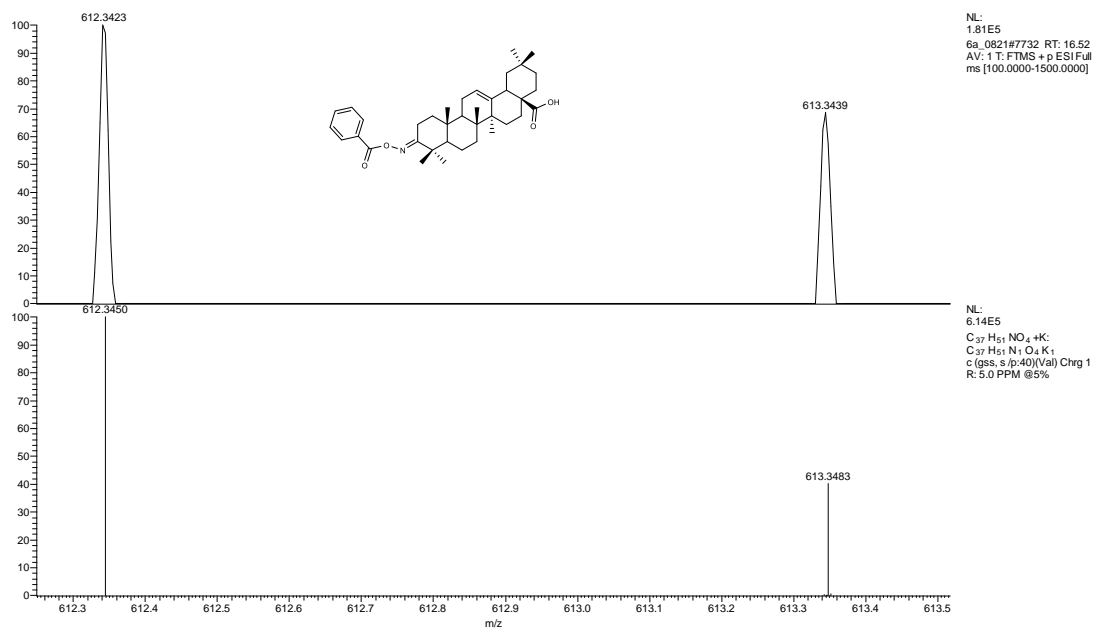

Fig.51 3k (HRMS)

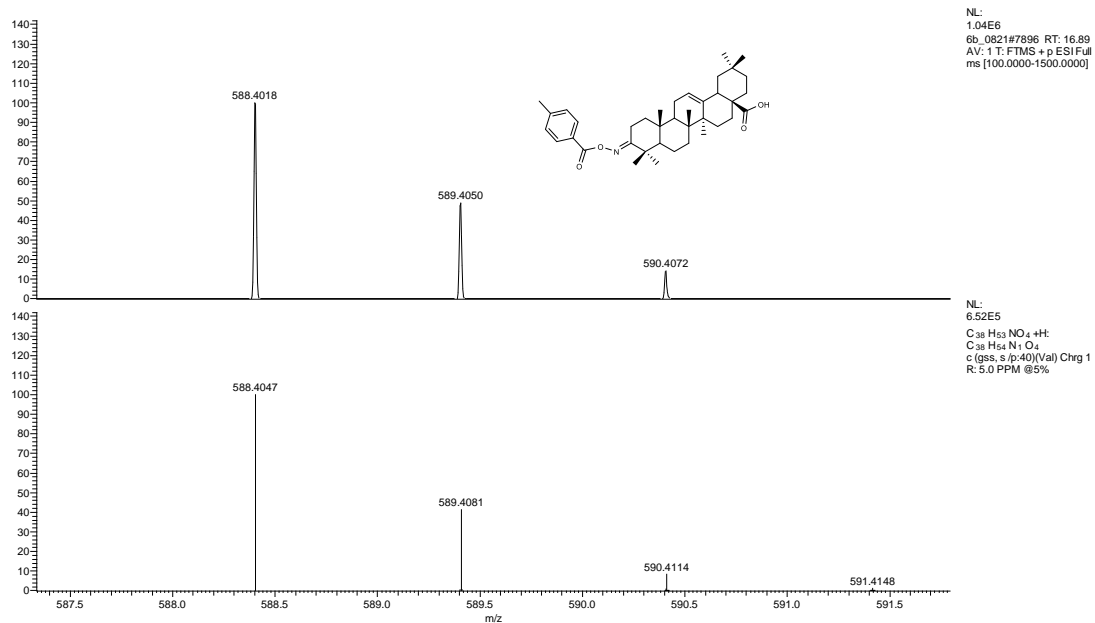

Fig.52 3l (HRMS)

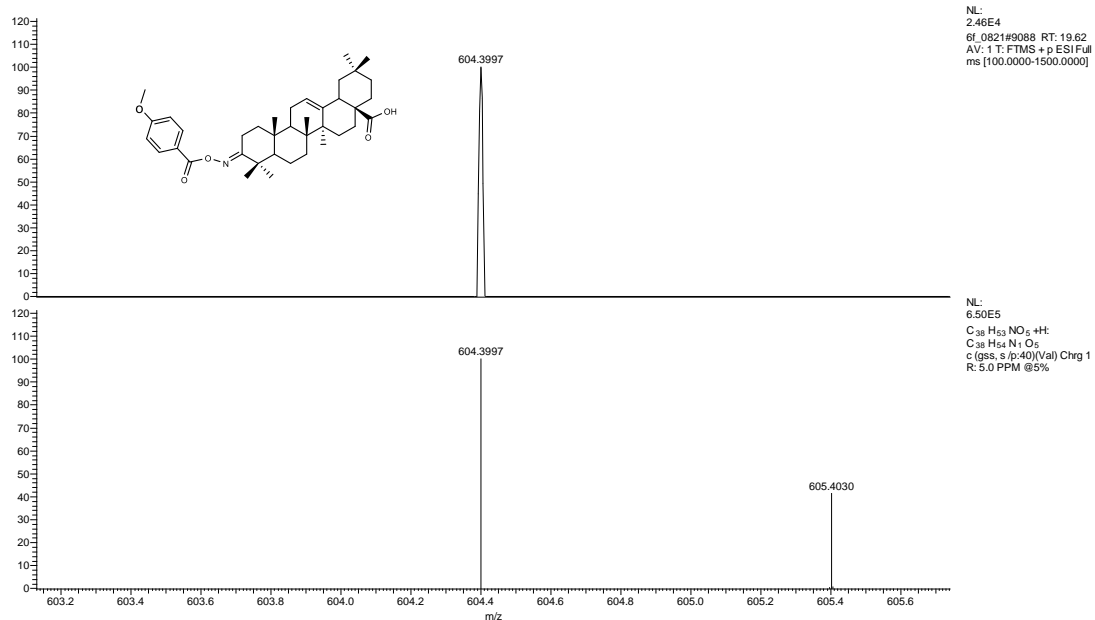

Fig.53 **3m** (HRMS)

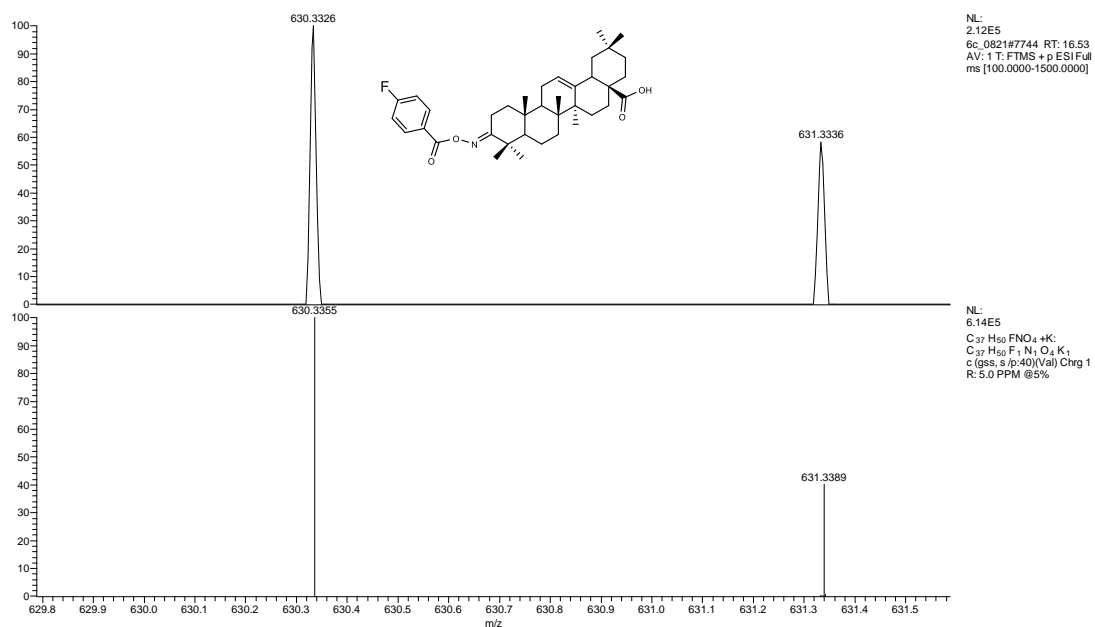

Fig.54 **3n** (HRMS)

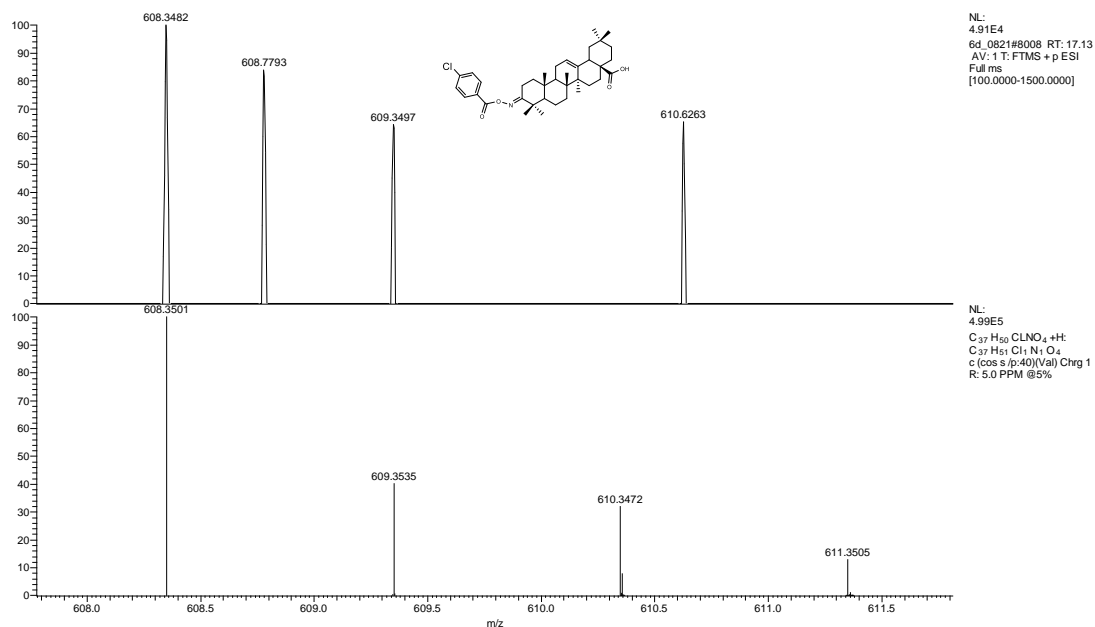

Fig.55 **3o** (HRMS)

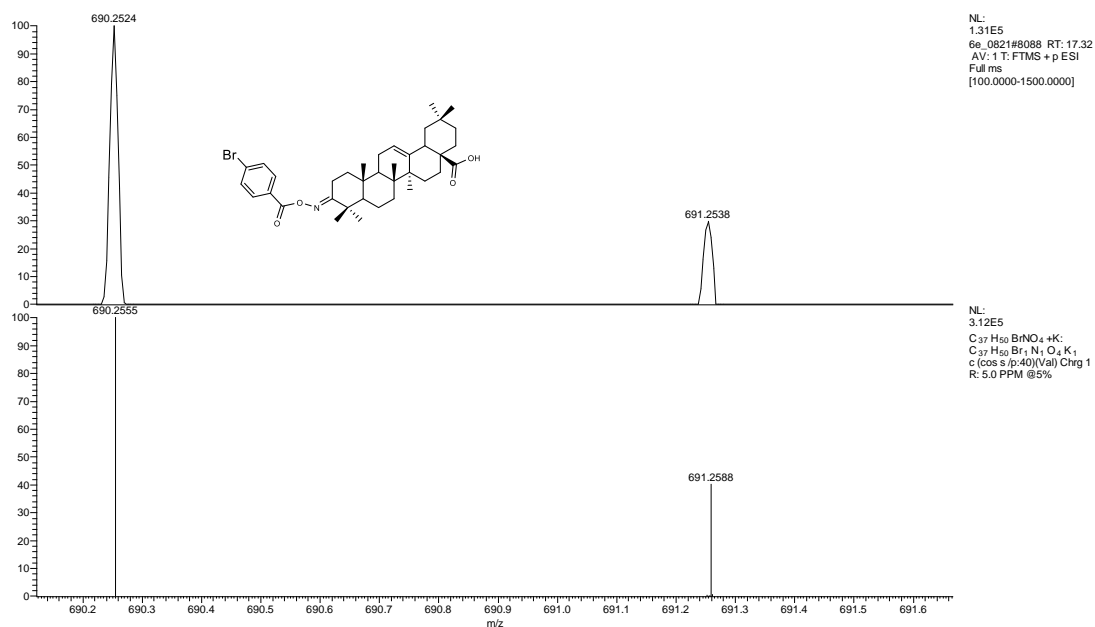

Fig.56 **3p** (HRMS)

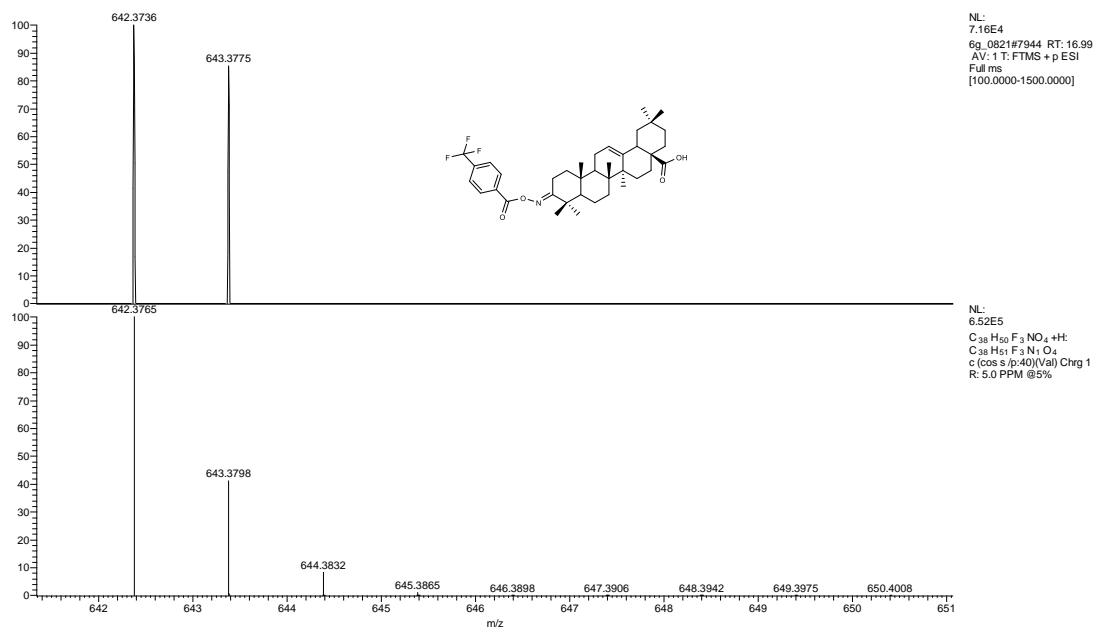

Fig.57 **3q** (HRMS)

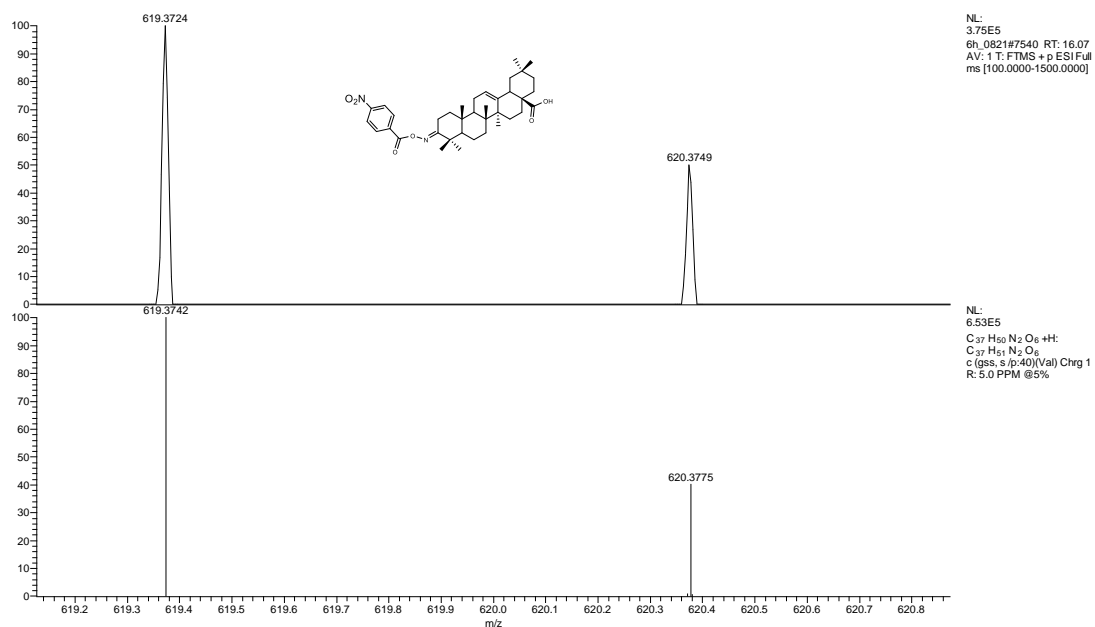

Fig.58 **3r** (HRMS)

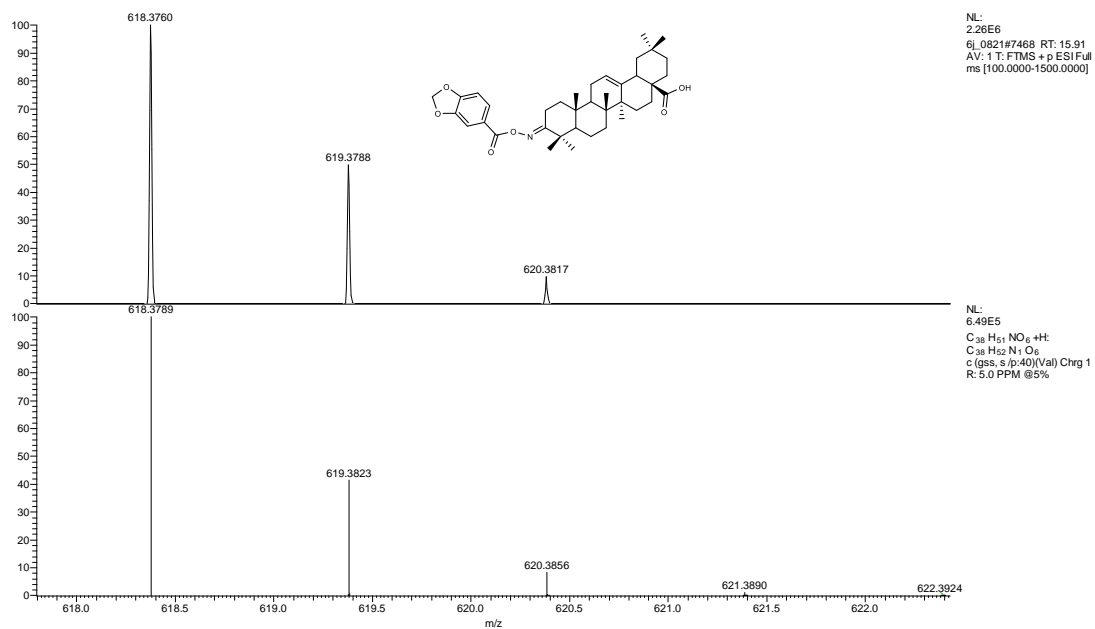

Fig.59 **3s** (HRMS)

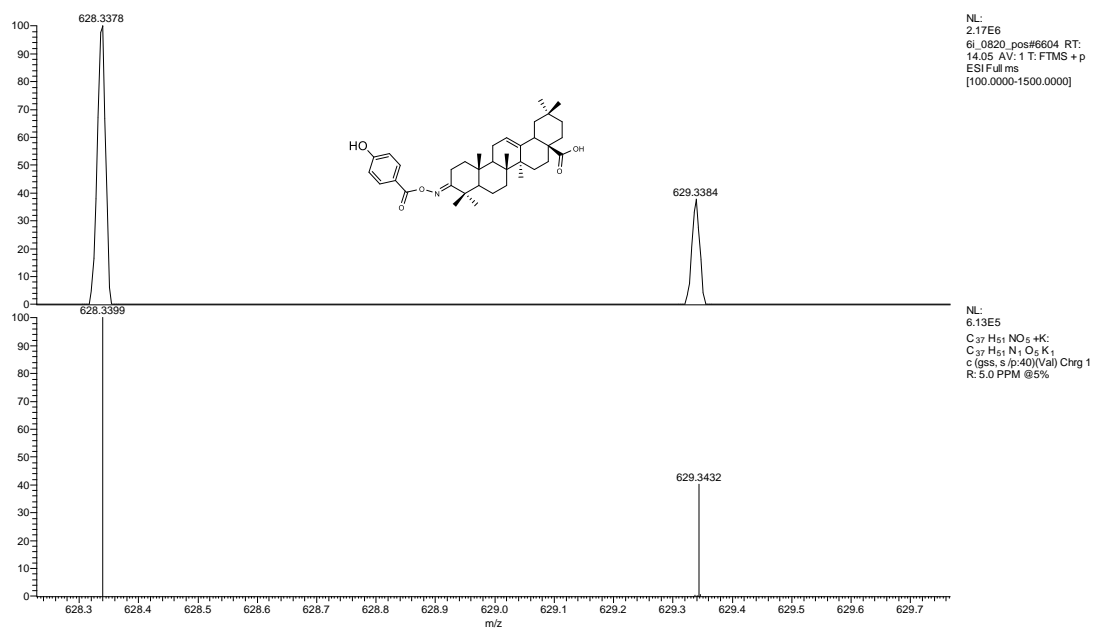

Fig.60 **3t** (HRMS)
